# Supplementary material for: What is the effect of prolonged sitting and physical activity on thoracic spine mobility? An observational study of young adults in a UK university setting
Source: PubMed Central journal article supplement — BMJ Open. 2018 May 5;8(5):e019371. doi: 10.1136/bmjopen-2017-019371 (PMC5942425; doi:10.1136/bmjopen-2017-019371), 2018-05-05
Supplement: bmjopen-2017-019371.draft_revisions.pdf [file bmjopen-2017-019371.draft_revisions.pdf]

# BMJ Open

BMJ Open is committed to open peer review. As part of this commitment we make the peer review history of every article we publish publicly available.

When an article is published we post the peer reviewers' comments and the authors' responses online. We also post the versions of the paper that were used during peer review. These are the versions that the peer review comments apply to.

The versions of the paper that follow are the versions that were submitted during the peer review process. They are not the versions of record or the final published versions. They should not be cited or distributed as the published version of this manuscript.

BMJ Open is an open access journal and the full, final, typeset and author-corrected version of record of the manuscript is available on our site with no access controls, subscription charges or pay-per-view fees (<http://bmjopen.bmj.com>).

If you have any questions on BMJ Open's open peer review process please email [info.bmjopen@bmj.com](mailto:info.bmjopen@bmj.com)

# BMJ Open

## The influence of sedentary behaviour and physical activity on thoracic spinal mobility in young adults: an observational study

|                               |                                                                                                                                                                                                                                                                                                                                                                                                                                                                                                                                                                                                                                                      |
|-------------------------------|------------------------------------------------------------------------------------------------------------------------------------------------------------------------------------------------------------------------------------------------------------------------------------------------------------------------------------------------------------------------------------------------------------------------------------------------------------------------------------------------------------------------------------------------------------------------------------------------------------------------------------------------------|
| Journal:                      | <i>BMJ Open</i>                                                                                                                                                                                                                                                                                                                                                                                                                                                                                                                                                                                                                                      |
| Manuscript ID                 | bmjopen-2017-019371                                                                                                                                                                                                                                                                                                                                                                                                                                                                                                                                                                                                                                  |
| Article Type:                 | Research                                                                                                                                                                                                                                                                                                                                                                                                                                                                                                                                                                                                                                             |
| Date Submitted by the Author: | 14-Sep-2017                                                                                                                                                                                                                                                                                                                                                                                                                                                                                                                                                                                                                                          |
| Complete List of Authors:     | Heneghan, Nicola; University of Birmingham, Centre of Precision Rehabilitation for Spinal Pain, School of Sport, Exercise and Rehabilitation Sciences<br>Baker, Gemma; Sandwell and West Birmingham Hospitals NHS Trust, Physiotherapy<br>Thomas, Kimberley ; Heart of England NHS Foundation Trust, Physiotherapy, Solihull Hospital<br>Falla, Deborah; University of Birmingham, Centre of Precision Rehabilitation for Spinal Pain, School of Sport, Exercise and Rehabilitation Sciences<br>Rushton, Alison; University of Birmingham, Centre of Precision Rehabilitation for Spinal Pain, School of Sport, Exercise and Rehabilitation Sciences |
| Keywords:                     | physical activity, spine mobility, spinal pain, sedentary behaviour, thoracic spine                                                                                                                                                                                                                                                                                                                                                                                                                                                                                                                                                                  |
|                               |                                                                                                                                                                                                                                                                                                                                                                                                                                                                                                                                                                                                                                                      |

SCHOLARONE™  
Manuscripts

**TITLE**

The influence of sedentary behaviour and physical activity on thoracic spinal mobility in young adults: an observational study

**Authors**

Heneghan NR, Baker G, Thomas K, Falla D, Rushton A

**Affiliations**

Dr Nicola Heneghan

Lecturer Physiotherapy

Centre of Precision Rehabilitation for Spinal Pain

School of Sport, Exercise and Rehabilitation Sciences

University of Birmingham

Birmingham, West Midlands

UK

Miss Gemma Baker

Physiotherapist

Sandwell and West Birmingham Trust

Birmingham, West Midlands

UK

Miss Kimberley Thomas

Physiotherapist

Solihull Hospital

Heart of England NHS Foundation Trust

Birmingham, West Midlands

UK

Professor Deborah Falla

Professor in Rehabilitation Science and Physiotherapy

1  
2  
3 Centre of Precision Rehabilitation for Spinal Pain  
4  
5 School of Sport, Exercise and Rehabilitation Sciences  
6  
7 University of Birmingham  
8  
9 Birmingham, West Midlands  
10  
11 UK  
12  
13  
14

15 Dr Alison Rushton Reader in Musculoskeletal Rehabilitation Sciences  
16  
17 Centre of Precision Rehabilitation for Spinal Pain  
18  
19 School of Sport, Exercise and Rehabilitation Sciences  
20  
21 University of Birmingham  
22  
23 Birmingham, West Midlands  
24  
25 UK  
26  
27

28 Correspondence:

29  
30 Nicola R Heneghan

31  
32 Centre of Precision Rehabilitation for Spinal Pain (CPR Spine),

33  
34 **School of Sport, Exercise & Rehabilitation Sciences**

35  
36 University of Birmingham, Edgbaston,

37  
38 Birmingham. B15 2TT. UK

39  
40 Email: [n.heneghan@bham.ac.uk](mailto:n.heneghan@bham.ac.uk)

41  
42 Tel: +44 121 415 8367  
43  
44  
45

46 **Keywords**

47  
48 Sedentary behaviour, physical activity, thoracic spine, spinal mobility, spinal pain  
49

50 **Word count**

51  
52 2171  
53  
54  
55  
56  
57

**ABSTRACT****Objective**

Sedentary behaviour has long been associated with neck and low back pain, although relatively little is known about the thoracic spine. Contributing up to 33% of functional neck movement, understanding the effect of sedentary behaviour and physical activity on thoracic spinal mobility may guide clinical practice and inform research of novel interventions in spinal pain research.

**Design**

An assessor blinded prospective observational study designed and reported in accordance with STROBE.

**Setting**

UK university (June to September 2016)

**Participants**

A convenience sample (18-30 years) was recruited and assigned to one of three groups based on self-report behaviours: 1] sitters (S) - sitting >7 hours/day + physical activity < 150 minutes/week, 2] physically active (PA) - moderate exercise >150 minutes/week + sitting < 4 hours/day, and 3] low activity (LA) - sitting 2-7 hours/day + physical activity <150 minutes/week.

**Outcome Measures**

Thoracic mobility was assessed in the heel sit position using Acumar digital goniometer; a validated measure. Descriptive and inferential analyses were used with analysis of covariance (ANCOVA) for between group differences and Pearson product coefficients for *post hoc* analysis of associations.

**Results**

The sample (n=92) comprised: S n=30, PA n=32 and LA n=30. Groups were comparable with respect to age and BMI.

Thoracic spine mobility (mean [SD], 95% CI) for the S, PA and LA group were 64.75[1.20] 62.37, 67.14°), 74.96[1.18] 72.61, 77.31°), 68.44[1.22] 66.02, 70.86°) respectively. Significant differences in thoracic mobility were detected between S and LA, S and PA (p<0.001). Correlations between thoracic rotation and exercise duration (r=0.67, p<0.001), sitting duration (r=-0.29, p<0.001) and days exercised (r=0.45, p<0.001) were observed.

**Conclusions**

Findings evidence reduced thoracic mobility in individuals who spend >7 hours/day sitting and <150 minutes/week of physical activity. Further research is now required to explore the possible causal relationships between activity behaviours and spinal musculoskeletal health.

**FIG****Article summary**

- The study employed rigorous methods and validated approaches to investigate thoracic spine functional mobility
- Thoracic spine mobility differed across self-reported sitting and physical activity behaviours, with reduced thoracic mobility observed for those sitting >7 hours per day and greatest ranges seen for those involved in >150 minutes physical activity per week
- Thoracic functional mobility varied based on the duration of behaviours (sitting and physical activity) and nature of physical activity

## INTRODUCTION

### Background/rationale

Sedentary lifestyles are an undesirable hallmark of modern society affecting a significant proportion of the population [1]. Prolonged sitting (a form of sedentary behaviour) has progressively become the norm with computerisation in the work place, transportation modernisation, and advances in domestic technology [2]. These developments are not only detrimental for physiological health and wellbeing with rising levels of obesity, diabetes, and cardiovascular disease [3], but also musculoskeletal health and well-being with recent research finding an association between prolonged sitting (>8 hours a day) and increased neck-shoulder [4-7] and low back pain [8]. It is therefore reasonable to suppose that sedentary behaviours may induce musculoskeletal changes within the relatively stiff thoracic spine; contributing towards the dysfunction in the adjacent spinal regions. The term "regional interdependence" describes a relationship whereby seemingly unrelated impairments in one anatomical region are associated with the development or persistence of pain in another [9]. Contributing to 33% and 21% of the movement occurring during neck flexion and rotation respectively [10], it is not surprising that the thoracic spine may contribute to the development of pain in surrounding the neck. Empirical evidence supports this theory, where thoracic movement dysfunction has been linked to pathologies in the neck [11] shoulder [12] and elbow [13]. Furthermore, there is a considerable body of compelling evidence to support the use of physiotherapy treatment techniques targeting the thoracic spine in clinical presentations of neck and shoulder pain [14-16]. Notwithstanding the paucity of literature exploring the influence of sedentary behaviours on the thoracic spine, one large cross sectional study (n=1886) did report a relatively high prevalence of thoracic spine pain, alongside neck and back pain in sedentary workers (36-41%), most notably in individuals with postural constraints, such as drivers and individuals unable to change tasks regularly [17]. However, the relationship between sedentary behaviour and

1  
2  
3 thoracic mobility, a proxy for spinal musculoskeletal health, contributing 80% of axial spinal trunk  
4  
5 rotation [18] has not yet been established.  
6

7  
8 Arguably those who are physically active may present with greater mobility of their thoracic region  
9  
10 where exercise promotes joint and soft tissue mobility, countering the deleterious adaptive  
11  
12 shortening of muscles and joint stiffness through static postures [19]. However, it remains unclear  
13  
14 what physical activity is comprised of in terms of; 'length of activity', 'type of activity', and 'how  
15  
16 often' the activity is performed. Physical activity has been previously defined as "more than 150  
17  
18 minutes of moderate to intense physical activity per week" [20]. However a focus on physical  
19  
20 exertion seems inadequate when considering musculoskeletal health [21], and arguably  
21  
22 biomechanical factors such as mobility and types of activity should also be considered, where some  
23  
24 physical activity have been sub classified as linear (straight-line e.g. running) or dynamic (rotational  
25  
26 e.g. tennis) in nature.  
27

28  
29 With sedentary lifestyles becoming increasingly the norm and evidence that sitting for just 1 hour  
30  
31 leads to increased spinal stiffness [22] it is now important to further investigate the relationship  
32  
33 between sedentary behaviours, physical activity and thoracic spine mobility. Therefore, the aim of  
34  
35 this study was to investigate the effect of prolonged sitting and physical activity on thoracic spine  
36  
37 mobility.  
38

### 39 40 41 **Objectives**

- 42  
43 1. Investigate the influence of sedentary behaviour on thoracic spine mobility
- 44  
45 2. Investigate the influence of physical activity on thoracic spine mobility
- 46  
47 3. To evaluate whether a relationship exists between duration of sitting and physical activity  
48  
49 and thoracic mobility  
50  
51  
52  
53  
54  
55  
56  
57  
58  
59  
60



## METHODS

### Design and setting

A single assessor blinded prospective observational study was conducted between April and June 2016 within a University setting; designed and reported in line with STROBE guidelines [23].

### Recruitment

Participants were recruited via email from the staff and student body of a large UK University using posters and email advertisement. Interested and eligible participants were provided with a participant information sheet, had their questions answered, and were asked to provide written informed consent. Screening against eligibility criteria was performed at the point of recruitment by a research assistant (KT).

The XXXXXXXXXXXXXXXXXXXXXXXXXXXX Ethics Committee granted ethical approval and the study was conducted according to the Declaration of Helsinki with participants able to withdraw at any point.

### Participants

Participants comprised a convenience sample of healthy asymptomatic volunteers from within a UK university population. Eligibility criteria included young adults 18-30 years, who fulfilled one of the following criteria based on Dunstan et al., [24] for sitting duration and NICE Guidelines [25] for duration of moderate intensity physical activity [26]. The sample size was based on a minimum of 30 per group to be able to detect a minimum clinically important difference (10-degrees) in thoracic spinal rotation movement between the groups, based on power 0.8 and at 5% significance level [27].

1. Individuals who participate in >150 minutes of physical activity per week and sit <4 hours per day (physically active)
2. Individuals who participate in <150 minutes of physical activity per week and sit >7 hours per day (sitters)

1  
2  
3 3. Individuals who spend between 4-7 hours sitting daily and <150 minutes of physical activity per  
4 week (low activity).

5  
6  
7 Exclusion criteria included a current or previous neuromusculoskeletal spine condition, rheumatoid  
8 arthritis, current or chronic respiratory condition, pregnancy, current hip or knee pathology, unable  
9 to adopt heel sit position, not fulfilling one of the criteria listed above.  
10  
11  
12

### 13 14 **Variables: Demographic data and outcome assessment**

#### 15 16 17 **Procedure**

18  
19 Piloting to determine the feasibility of the protocol was performed prior to the main study.  
20  
21 For the main study, one researcher (KT) recruited, screened and took all baseline measures to  
22 characterise the sample [age, gender, body mass index (BMI), exercise type/duration, sitting  
23 duration]. The primary measure of interest, thoracic spine mobility, was recorded by a blinded  
24 assessor (GB) with the participant in a heel-sit position [28, 29] (Figures 1 and 2). Following  
25 familiarisation and 3 practice attempts from a position of full right to left rotation to ensure stability  
26 of measures [27], the end range position of the 4th rotation was measured 3 times using an Acumar  
27 digital inclinometer placed over the C7-T1 interspinous space [27, 29]. The mean of the 3 measures  
28 for full right and left rotation were recorded and retained for data analysis [27].  
29  
30  
31  
32  
33  
34  
35  
36  
37  
38  
39

40 **Insert Figure 1 and 2**

#### 41 42 43 44 **Outcome measure**

45  
46 The Acumar digital inclinometer (Acumar, Model ACU 360, Lafayette Instrument Company,  
47 Indiana, USA) was used to measure thoracic rotation. The heel-sit position was chosen to minimise  
48 concurrent movement occurring in the relatively mobile lumbar spine, a limitation of sitting where  
49 rotation comprises motion from both regions [28]. Reliability (ICC<sub>2,1</sub> [95% confidence interval], 0.88  
50  
51  
52  
53  
54  
55  
56  
57  
58  
59  
60

1  
2  
3 [0.78, 0.93]) and strong criterion ( $r=0.88$ ) and concurrent validity ( $r=0.98$ ) against a combined  
4  
5 imaging and motion analysis approach has previously been established [28, 29].  
6  
7

### 8 9 **Bias**

10  
11 A number of measures were put in place to minimise the influence of bias, including standardisation  
12  
13 of procedures, assessor blinding, partial blinding of participants in that they were not made aware of  
14  
15 planned comparison between groups and piloting of all procedures in advance of the main study.  
16  
17

### 18 19 **Statistical methods**

20  
21 Data were transferred to SPSS (version 22, IBM, New York, NY) and checked to ensure their  
22  
23 integrity by two researchers. Descriptive and inferential statistical analyses included a summary of  
24  
25 participant characteristics using means, standard deviations and one-way analysis of variance  
26  
27 (ANOVA). Further inferential analyses included an analysis of co-variance (ANCOVA) to determine  
28  
29 main effects including Bonferroni correction (with pairwise comparisons) to evaluate between group  
30  
31 differences in thoracic spine mobility with gender as a covariate (as groups were imbalanced with  
32  
33 respect to gender). Pearson product correlational analyses were used to evaluate relationships  
34  
35 between thoracic mobility and self-report measures of sitting duration, days active, and physical  
36  
37 activity. Strength of associations were based on established criteria where: 0.00-0.25 implies a weak  
38  
39 association, 0.26-0.50 a low association, 0.51-0.75 a moderate association and 0.76-1.00 a strong  
40  
41 association [30]. For all analyses statistical significance was set at  $p<0.05$ .  
42  
43  
44  
45  
46

## 47 **RESULTS**

### 48 49 **Participants, descriptive data and outcome data**

50  
51 A total of 92 participants were recruited. Baseline characteristics, self-reported behaviours  
52  
53 for physical activity (exercise duration and types of exercise), and sitting duration are presented in  
54  
55  
56  
57

Table 1. Groups were comparable with respect to age and BMI ( $p>0.05$ ), but not for gender with more women were recruited to the low activity and sitter group.

**Table 1: Participant characteristics**

|                                                                    | <b>Sitters<br/>n=30</b>      | <b>Physically<br/>active n=32</b> | <b>Low activity<br/>n=30</b> |
|--------------------------------------------------------------------|------------------------------|-----------------------------------|------------------------------|
| <b>Age in years, mean (SD)</b>                                     | 22.73 (2.92)                 | 22.03 (2.65)                      | 20.93 (2.49)                 |
| <b>Gender (Women %)</b>                                            | 63.3 <sup>§</sup>            | 47.0 <sup>§</sup>                 | 76.7 <sup>§</sup>            |
| <b>BMI, mean (SD)</b>                                              | 22.90 (2.47)                 | 23.12 (2.92)                      | 22.60 (2.36)                 |
| <b>Thoracic rotation degrees mean (SD) 95% Confidence interval</b> | 64.74 (8.93)<br>62.37, 67.14 | 74.96 (8.26)<br>72.61,<br>77.31   | 68.44 (4.36)<br>66.02, 70.86 |
| <b>Exercise duration (minutes)</b>                                 |                              |                                   |                              |
| 0-30                                                               | 7                            | -                                 | 3                            |
| 30-60                                                              | 4                            | -                                 | 6                            |
| 60-90                                                              | 15                           | -                                 | 5                            |
| 90-150                                                             | 4                            | -                                 | 16                           |
| 150-180                                                            | -                            | 4                                 | -                            |
| 180-210                                                            | -                            | 12                                | -                            |
| 210-240                                                            | -                            | 5                                 | -                            |
| 240+                                                               | -                            | 11                                | -                            |
| <b>Types of exercise (frequency)</b>                               |                              |                                   |                              |
| Gym cardio                                                         | 6                            | 10                                | 1                            |
| Gym weights                                                        | 5                            | 3                                 | 9                            |
| Running                                                            | 10                           | 6                                 | -                            |
| Cycling                                                            | 3                            | 1                                 | 3                            |
| Dance/gymnastics                                                   | -                            | 3                                 | 1                            |
| Football                                                           | -                            | 4                                 | 2                            |
| Netball/basketball                                                 | -                            | 1                                 | 1                            |
| Tennis                                                             | -                            | 3                                 | 2                            |
| Rowing                                                             | -                            | 1                                 | -                            |
| Martial arts                                                       | 1                            | -                                 | -                            |
| Other                                                              | 3                            | -                                 | 11                           |
| None                                                               | 2                            | -                                 | -                            |
| <b>Sitting duration (hours)</b>                                    |                              |                                   |                              |
| 0-2                                                                | -                            | 1                                 | -                            |
| 2-4                                                                | -                            | 5                                 | 6                            |
| 4-6                                                                | -                            | 11                                | 17                           |
| 6-7                                                                | -                            | 15                                | 7                            |
| 7-8                                                                | 9                            | -                                 | -                            |
| 8-9                                                                | 9                            | -                                 | -                            |
| 9-10                                                               | 6                            | -                                 | -                            |
| 10+                                                                | 6                            | -                                 | -                            |

<sup>§</sup> Statistically different  $p<0.001$

## Main results

Thoracic spine mobility (mean, SD and 95% CI) for the sitters, physically active and low activity groups were 64.74±6.33 (62.37,67.14°), 75.12±8.26 (72.61, 77.31°), 68.28±4.36 (66.02, 70.86°) respectively (Figure 3).

A one-way ANCOVA was conducted having checked data met the assumptions to compare thoracic mobility between groups, whilst controlling for gender. There was a significant difference between groups [F (2,88)=18.66 P<0.001] with the post hoc analyses confirming differences between the low activity and physically active groups (p<0.001), the physically active group and sitters (p<0.001), although not between the low activity and sitters. Thoracic spine mobility (mean, SD and 95% CI) was 64.75±1.20 (95%CI 62.37-67.14°), 74.96±1.18 (95%CI 72.61-77.31°), 68.44±1.22 (95%CI 66.02-70.86°) for the sitters, physically active and low activity group respectively.

**Insert Figure 3**

## *Other analyses: Correlational analysis*

Across the whole sample, a moderate positive correlation was found between thoracic mobility and exercise duration (r=0.67, p<0.001), a low negative correlation between sitting duration (r=-0.29, p<0.001) and low positive correlation between number of days exercised (r=0.45, p<0.001).

## DISCUSSION

## Key results

This is the first rigorous observational study to investigate sedentary behaviour, physical activity and thoracic spine mobility in young adults. Whilst no causal relationship can be inferred from this study, findings provide preliminary evidence to posit a beneficial effect of physical activity and the deleterious effects of sitting on thoracic mobility, a proxy for spinal musculoskeletal health.

## Interpretation

The low activity group contained the highest percentage of women, with more than half the group involved in 90-150 minutes of physical activity and 4-6 hours sitting duration a week. Failing to meet the national guidelines for exercise [31] does appear to impact thoracic mobility, compared to those who are fulfilling the recommendations of >150 minutes physical activity per week [25] and sit for less than 4 hours per day [24]. In contrast, the findings from the physically active group endorse the Public Health England [31] recommendation that exercise is beneficial for musculoskeletal health, with those involved in physical activity having significantly greater thoracic mobility than those who are more sedentary. There is persuasive evidence from this study of a relationship between prolonged sitting and thoracic mobility, with >10° less mobility for the sitters compared to those who were physically active. Moreover, with sitters having approximately 4° less mobility than those in the low activity group, our findings also support the need further investigation of not only increased levels of physical activity, but also reduced sitting duration for optimal spinal musculoskeletal health. Although the majority of individuals in the low activity group sit between 4-7 hours a day (comparable to the findings of the physical activity group), it appears that some physical activity, albeit less than the guidelines is beneficial to mitigate the 'detrimental' effects of sitting; with those in the low activity group having >6° less thoracic mobility than those in the physically active group.

These findings lend support for those young adults who comply with national guidelines on physical activity having better musculoskeletal health. Findings also support the need to further investigate types of physical activity, where consideration is made specifically to biomechanical as

1  
2  
3 well as physiological parameters of physical activity. With evidence of associations between thoracic  
4 mobility and exercise duration (positive), number of days exercised (positive) and sitting duration  
5 (negative), further research is now required to investigate the potentially causal relationship of  
6 reduced thoracic mobility and musculoskeletal complaints such as neck, thoracic and low back pain.  
7  
8  
9

### 10 11 12 13 **Strengths and limitations**

14  
15 Reported in line with STROBE and employing rigorous methods, including assessor blinding,  
16 we have established differences in thoracic mobility in a large population of young adults. Whilst  
17 self-reported measures of physical activity and sitting duration potentially lead to under- or over-  
18 estimation of sitting and physical activity behaviours, they are able to capture information relating to  
19 activities which are not compatible or insensitive to accelerometry such as water based activity or  
20 cycling and stair climbing respectively [32].  
21  
22  
23  
24  
25  
26  
27

28 Although not examined here, patterns of sitting are a potentially important consideration in  
29 future studies, where breaks have been shown to be beneficial on pro-inflammatory markers; linked  
30 to development of neck-shoulder pain [7]. Moreover, future studies could also usefully evaluate  
31 other sitting parameters where constrained or poor postures, ergonomic parameters e.g. keyboard  
32 position, may place greater loads on musculoskeletal tissues [17, 33-35].  
33  
34  
35  
36  
37  
38  
39  
40

### 41 **Generalisability**

42  
43 To enable generalisability to different populations further studies are required with different  
44 age groups and individuals from a range of socio-demographic backgrounds. However it is likely that  
45 this population comprising young adults are an at 'risk' group for developing musculoskeletal  
46 complaints, with many likely to work in occupations where a substantial periods of time will be  
47 sitting [7]. Moreover this population represent a group where there is potential to influence thoracic  
48 mobility, with spinal degenerative changes often developing at and beyond the third decade [36]  
49  
50  
51  
52  
53  
54  
55  
56  
57  
58  
59  
60

1  
2  
3 and therefore likely less responsive to physical therapy interventions targeting stiff joints and  
4  
5 muscles.

## 6 7 8 9 **CONCLUSION**

10  
11 This study provides evidence of reduced thoracic mobility in individuals who spend >7 hours  
12  
13 a day sitting and <150 minutes of physical activity a week. With observed associations between  
14  
15 thoracic mobility and exercise and sitting duration, further research is now required to explore the  
16  
17 possible causal relationship between physical activity behaviours on spinal musculoskeletal health  
18  
19 and subsequently their relationship to spinal complaints.  
20  
21  
22  
23  
24

25 **Contribution statement:** NH was the chief investigator leading the study design, analyses and  
26  
27 dissemination. KT and GB conducted data collection and preliminary analyses. All authors (NH, GB,  
28  
29 KT, DF, AR) contributed to analysis and interpretation of results, conclusions and dissemination. NH  
30  
31 drafted the initial manuscript. All authors have read, contributed to and agreed on the final  
32  
33 manuscript.  
34  
35

36  
37 **Competing Interests Statement:** All authors have completed the ICMJE uniform disclosure form at  
38  
39 [www.icmje.org/coi\\_disclosure.pdf](http://www.icmje.org/coi_disclosure.pdf) and declare: no support from any organisation for the submitted  
40  
41 work; no financial relationships with any organisations that might have an interest in the submitted  
42  
43 work in the previous three years; no other relationships or activities that could appear to have  
44  
45 influenced the submitted work.  
46  
47

48 **Funding:** None  
49

50  
51 **Data sharing:** Raw data is held by the lead author at the University of Birmingham in accordance  
52  
53 with guidelines. Data is available by contacting the lead author at [n.heneghan@bham.ac.uk](mailto:n.heneghan@bham.ac.uk)  
54  
55

## 56 **REFERENCES**



1. Owen N, *Sedentary behavior: understanding and influencing adults' prolonged sitting time*. *Prev Med*, 2012. **55**(6): p. 535-539.
2. Owen N, et al., *Too Much Sitting: The population-health science of sedentary behaviour* *Exercise and Sports Sciences Reviews*, 2010. **38**(3): p. 105-113.
3. Wilmot, E.G., et al., *Sedentary time in adults and the association with diabetes, cardiovascular disease and death: systematic review and meta-analysis*. *Diabetologia*, 2012. **55**(11): p. 2895-2905.
4. Ariens G, et al., *Are neck flexion, neck rotation, and sitting at work risk factors for neck pain? Results of a prospective cohort study*. *Occup Environ Med*, 2001. **58**(3): p. 200-207.
5. Hallman DM, et al., *Association between objectively measured sitting time and neck-shoulder pain among blue-collar workers*. *Int Arch Occup Environ Health*, 2015. **88**(8): p. 1031-42.
6. Straker, L.M., O'Sullivan, P.B., Smith, A.J. and Perry, M.C, *Relationships between prolonged neck/shoulder pain and sitting spinal posture in male and female adolescents*. *Manual Therapy*, 2009. **14**: p. 321-329.
7. Hallman DM, et al., *Temporal patterns of sitting at work are associated with neck-shoulder pain in blue-collar workers: a cross-sectional analysis of accelerometer data in the DPHACTO study*. *Int Arch Occup Environ Health*, 2016. **89**(5): p. 823-33.
8. Gupta N, et al., *Is objectively measured sitting time associated with low back pain? A cross-sectional investigation in the NOMAD study*. *PLoS ONE [Electronic Resource]*, 2015. **10**: p. 3.
9. Sueki, D., Cleland, JA., and Wainner, RS. , *A regional interdependence model of musculoskeletal dysfunction: research, mechanisms, and clinical implications*. *Journal of Manual and Manipulative Therapy* 2013. **21**(2): p. 90-102.
10. Tsang SM, Szeto GP, and Lee RY, *Normal kinematics of the neck: the interplay between the cervical and thoracic spines*. *Manual Therapy*, 2013. **18**(5): p. 431-7.
11. Falla D, et al., *People With Chronic Neck Pain Walk With a Stiffer Spine*. *J Orthop Sports Phys Ther*, 2017(3): p. 1-33.
12. Theisen C, et al., *Co-occurrence of outlet impingement syndrome of the shoulder and restricted range of motion in the thoracic spine--a prospective study with ultrasound-based motion analysis*. *BMC Musculoskelet Disord*, 2010(11): p. 135.
13. Berglund, A., et al., *The association between exposure to a rear-end collision and future health complaints*. *Journal of Clinical Epidemiology*, 2001. **54**(8): p. 851-856.
14. Heneghan NR and Rushton A, *Understanding why the thoracic region is the 'Cinderella' region of the spine*. *Manual Therapy*, 2015. **21**: p. 274-276.
15. Walser RF, Meserve BB, and Boucher TR, *The effectiveness of thoracic spine manipulation for the management of musculoskeletal conditions: a systematic review and meta-analysis of randomized clinical trials*. *J Man Manip Ther*, 2009. **17**(4): p. 237-338.
16. Huisman PA, Speksnijder CM, and d.W. A, *The effect of thoracic spine manipulation on pain and disability in patients with non-specific neck pain: a systematic review*. *Disabil Rehabil*, 2013. **36**(20): p. 1677-1685.
17. Roquelaure Y, B.J., Ha C, Le Marec F, Fouquet N, Ramond-Roquin A, Goldberg M, Descatha A, Petit A, Imbernon E., *Incidence and Risk Factors for Thoracic Spine Pain in the Working Population: The French Pays de la Loire Study*. *Arthritis Care Res (Hoboken)*, 2014. **66**(11): p. 1695-1702.
18. Fujii R, et al., *Kinematics of the lumbar spine in trunk rotation: in vivo three-dimensional analysis using magnetic resonance imaging*. *Eur Spine J* 2007. **16**(11): p. 1867-1874.
19. Page P, *Current concepts in muscle stretching for exercise and rehabilitation* *International Journal of Sports Physical Therapy*, 2012. **7**(1): p. 109-119.
20. Steene-Johannessen J, et al., *Are self-report measures able to define individuals as physically active or inactive? Medicine & Science in Sports & Exercise*, 2016. **48**: p. 235-244.

- 1
  - 2
  - 3
  - 4
  - 5
  - 6
  - 7
  - 8
  - 9
  - 10
  - 11
  - 12
  - 13
  - 14
  - 15
  - 16
  - 17
  - 18
  - 19
  - 20
  - 21
  - 22
  - 23
  - 24
  - 25
  - 26
  - 27
  - 28
  - 29
  - 30
  - 31
  - 32
  - 33
  - 34
  - 35
  - 36
  - 37
  - 38
  - 39
  - 40
  - 41
  - 42
  - 43
  - 44
  - 45
  - 46
  - 47
  - 48
  - 49
  - 50
  - 51
  - 52
  - 53
  - 54
  - 55
  - 56
  - 57
  - 58
  - 59
  - 60
21. Hildebrandt VH, et al., *The relationship between leisure time, physical activities and musculoskeletal symptoms and disability in worker populations*. *Int Arch Occup Environ Health*, 2000. **73**(8): p. 507-18.
22. Beach, T.A.C., Parkinson, R.J., Stothard, P.J., and Callaghan, J.P, *Effects of prolonged sitting on the passive flexion stiffness of the in vivo lumbar spine*. *The Spine Journal*, 2005(5): p. 145-154.
23. von Elm E, et al., *Strengthening the Reporting of Observational Studies in Epidemiology (STROBE)statement: guidelines for reporting observational studies*. *BMJ*, 2007. **335**(7624): p. 806-808.
24. Dunstan DW, et al., *Too much sitting - A health hazard*. *Diabetes Research and Clinical Practice*, 2012. **97**: p. 368-376.
25. National Institute of Clinical Excellence. *Physical Activity: for NHS staff, patients and carers*. 2015 [cited <https://www.nice.org.uk/guidance/QS84/chapter/Quality-statement-1-Advice-for-adults-during-NHS-Health-Checks>]
26. Department of Health. *At Least Five a Week: Evidence on the impact of physical activity and its relationship to health*. 2004 [cited [http://webarchive.nationalarchives.gov.uk/+/dh.gov.uk/en/publicationsandstatistics/publications/publicationspolicyandguidance/dh\\_4080994](http://webarchive.nationalarchives.gov.uk/+/dh.gov.uk/en/publicationsandstatistics/publications/publicationspolicyandguidance/dh_4080994)].
27. Heneghan NR, et al., *Stability and intra-tester reliability of an in vivo measurement of thoracic axial rotation using an innovative methodology*. *Manual Therapy*, 2009. **14**(4): p. 452-455
28. Johnson KD, et al., *Reliability of thoracic spine rotation range-of-motion measurements in healthy adults*. *Journal of Athletic Training*, 2012. **47**(1): p. 52-60.
29. Bucke J, et al., *Validity of the digital inclinometer and iPhone when measuring thoracic rotation*. *Journal of Athletic Training*, 2017. **(Accepted)**.
30. Pett AM, *Nonparametric Statistics for Health Care Research* 2016, USA: Sage Publications.
31. Fenton K. *Preventing Musculoskeletal Disorders has wider impacts for Public Health*. *Public Health Matters* 2016 [cited <https://publichealthmatters.blog.gov.uk/2016/01/11/preventing-musculoskeletal-disorders-has-wider-impacts-for-public-health/>].
32. Miles L, *Physical Activity and Health*. *British Nutrition Foundation Bulletin*, 2007(32): p. 314-363.
33. Szeto GPY, Straker LM, and O.S. PB, *A comparison of symptomatic and asymptomatic office workers performing monotonous keyboard work -2: Neck and shoulder kinematics*. *Manual Therapy*, 2005. **10**(4): p. 281-291.
34. Hoe VC, et al., *Ergonomic design and training for preventing work-related musculoskeletal disorders of the upper limb and neck in adults*. *Cochrane Database Syst Rev*, 2012. **15**(8): p. CD008570.
35. Jun D, et al., *Physical risk factors for developing non-specific neck pain in office workers: a systematic review and meta-analysis*. *Int Arch Occup Environ Health*, 2017. **21**.
36. Edmonston SJ and Singer KP, *Thoracic spine: anatomical and biomechanical considerations for manual therapy*. *Manual Therapy*, 1997. **2**(3): p. 132-143.

1  
2  
3  
4  
5  
6  
7  
8  
9  
10  
11  
12  
13  
14  
15  
16  
17  
18  
19  
20  
21  
22  
23  
24  
25  
26  
27  
28  
29  
30  
31  
32  
33  
34  
35  
36  
37  
38  
39  
40  
41  
42  
43  
44  
45  
46  
47  
48  
49  
50  
51  
52  
53  
54  
55  
56  
57  
58  
59  
60

**Figure 3. Thoracic mobility measured from all participants classified as either low activity, physically active or sitters**

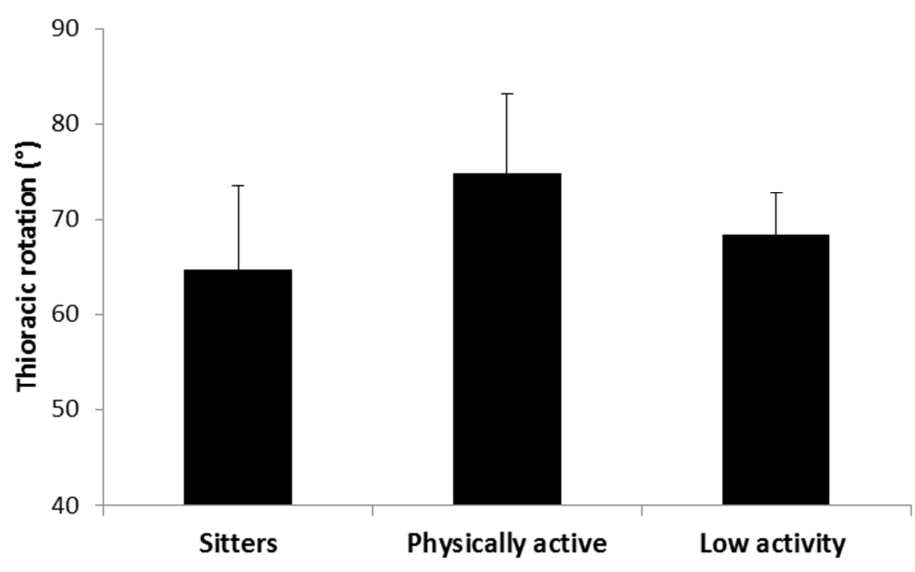

For review only

STROBE Statement—Checklist of items that should be included in reports of *case-control studies*

|                              | Item No | Page number | Recommendation                                                                                                                                                                                    |
|------------------------------|---------|-------------|---------------------------------------------------------------------------------------------------------------------------------------------------------------------------------------------------|
| <b>Title and abstract</b>    | 1       | 1           | (a) Indicate the study's design with a commonly used term in the title or the abstract                                                                                                            |
|                              |         | 3           | (b) Provide in the abstract an informative and balanced summary of what was done and what was found                                                                                               |
| <b>Introduction</b>          |         |             |                                                                                                                                                                                                   |
| Background/rationale         | 2       | 5           | Explain the scientific background and rationale for the investigation being reported                                                                                                              |
| Objectives                   | 3       | 6           | State specific objectives, including any prespecified hypotheses                                                                                                                                  |
| <b>Methods</b>               |         |             |                                                                                                                                                                                                   |
| Study design                 | 4       | 7           | Present key elements of study design early in the paper                                                                                                                                           |
| Setting                      | 5       | 7           | Describe the setting, locations, and relevant dates, including periods of recruitment, exposure, follow-up, and data collection                                                                   |
| Participants                 | 6       | 7           | (a) Give the eligibility criteria, and the sources and methods of case ascertainment and control selection. Give the rationale for the choice of cases and controls                               |
|                              |         | 7           | (b) For matched studies, give matching criteria and the number of controls per case                                                                                                               |
| Variables                    | 7       | 8           | Clearly define all outcomes, exposures, predictors, potential confounders, and effect modifiers. Give diagnostic criteria, if applicable                                                          |
| Data sources/<br>measurement | 8*      | 8           | For each variable of interest, give sources of data and details of methods of assessment (measurement). Describe comparability of assessment methods if there is more than one group              |
| Bias                         | 9       | 9           | Describe any efforts to address potential sources of bias                                                                                                                                         |
| Study size                   | 10      | 7           | Explain how the study size was arrived at                                                                                                                                                         |
| Quantitative variables       | 11      | 8           | Explain how quantitative variables were handled in the analyses. If applicable, describe which groupings were chosen and why                                                                      |
| Statistical methods          | 12      | 9           | (a) Describe all statistical methods, including those used to control for confounding                                                                                                             |
|                              |         |             | (b) Describe any methods used to examine subgroups and interactions                                                                                                                               |
|                              |         |             | (c) Explain how missing data were addressed                                                                                                                                                       |
|                              |         |             | (d) If applicable, explain how matching of cases and controls was addressed                                                                                                                       |
|                              |         |             | (e) Describe any sensitivity analyses                                                                                                                                                             |
| <b>Results</b>               |         |             |                                                                                                                                                                                                   |
| Participants                 | 13*     | 9           | (a) Report numbers of individuals at each stage of study—eg numbers potentially eligible, examined for eligibility, confirmed eligible, included in the study, completing follow-up, and analysed |
|                              |         |             | (b) Give reasons for non-participation at each stage                                                                                                                                              |
|                              |         |             | (c) Consider use of a flow diagram                                                                                                                                                                |
| Descriptive data             | 14*     | 10          | (a) Give characteristics of study participants (eg demographic, clinical, social) and information on exposures and potential confounders                                                          |
|                              |         |             | (b) Indicate number of participants with missing data for each variable of interest                                                                                                               |
| Outcome data                 | 15*     | 10          | Report numbers in each exposure category, or summary measures of                                                                                                                                  |

|    |              |    |                                                                         |
|----|--------------|----|-------------------------------------------------------------------------|
| 1  |              |    | exposure                                                                |
| 2  |              |    |                                                                         |
| 3  | Main results | 16 | 11                                                                      |
| 4  |              |    | (a) Give unadjusted estimates and, if applicable, confounder-adjusted   |
| 5  |              |    | estimates and their precision (eg, 95% confidence interval). Make clear |
| 6  |              |    | which confounders were adjusted for and why they were included          |
| 7  |              |    | (b) Report category boundaries when continuous variables were           |
| 8  |              |    | categorized                                                             |
| 9  |              |    | (c) If relevant, consider translating estimates of relative risk into   |
| 10 |              |    | absolute risk for a meaningful time period                              |
| 11 |              |    |                                                                         |
| 12 |              |    |                                                                         |
| 13 |              |    |                                                                         |
| 14 |              |    |                                                                         |
| 15 |              |    |                                                                         |
| 16 |              |    |                                                                         |
| 17 |              |    |                                                                         |
| 18 |              |    |                                                                         |
| 19 |              |    |                                                                         |
| 20 |              |    |                                                                         |
| 21 |              |    |                                                                         |
| 22 |              |    |                                                                         |
| 23 |              |    |                                                                         |
| 24 |              |    |                                                                         |
| 25 |              |    |                                                                         |
| 26 |              |    |                                                                         |
| 27 |              |    |                                                                         |
| 28 |              |    |                                                                         |
| 29 |              |    |                                                                         |
| 30 |              |    |                                                                         |
| 31 |              |    |                                                                         |
| 32 |              |    |                                                                         |
| 33 |              |    |                                                                         |
| 34 |              |    |                                                                         |
| 35 |              |    |                                                                         |
| 36 |              |    |                                                                         |
| 37 |              |    |                                                                         |
| 38 |              |    |                                                                         |
| 39 |              |    |                                                                         |
| 40 |              |    |                                                                         |
| 41 |              |    |                                                                         |
| 42 |              |    |                                                                         |
| 43 |              |    |                                                                         |
| 44 |              |    |                                                                         |
| 45 |              |    |                                                                         |
| 46 |              |    |                                                                         |
| 47 |              |    |                                                                         |
| 48 |              |    |                                                                         |
| 49 |              |    |                                                                         |
| 50 |              |    |                                                                         |
| 51 |              |    |                                                                         |
| 52 |              |    |                                                                         |
| 53 |              |    |                                                                         |
| 54 |              |    |                                                                         |
| 55 |              |    |                                                                         |
| 56 |              |    |                                                                         |
| 57 |              |    |                                                                         |
| 58 |              |    |                                                                         |
| 59 |              |    |                                                                         |
| 60 |              |    |                                                                         |

1  
2  
3 Other analyses 17 7 Report other analyses done—eg analyses of subgroups and interactions,  
4 and sensitivity analyses  
5

---

### 6 Discussion

7  
8 Key results 18 7 11 Summarise key results with reference to study objectives  
9 Limitations 19 9 13 Discuss limitations of the study, taking into account sources of  
10 potential bias or imprecision. Discuss both direction and magnitude of any potential bias  
11 Interpretation 20 8 12 Give a cautious overall interpretation of results considering objectives,  
12 limitations, multiplicity of analyses, results from similar studies, and other relevant evidence  
13 Generalisability 21 9 13 Discuss the generalisability (external validity) of the study results  
14

---

### 15 Other information

16 Funding 22 10 14 Give the source of funding and the role of the funders for the present  
17 study and, if applicable, for the original study on which the present article is based  
18

19  
20 \*Give information separately for cases and controls.  
21

22  
23 **Note:** An Explanation and Elaboration article discusses each checklist item and gives methodological background and  
24 published examples of transparent reporting. The STROBE checklist is best used in conjunction with this article (freely  
25 available on the Web sites of PLoS Medicine at <http://www.plosmedicine.org/>, Annals of Internal Medicine at  
26 <http://www.annals.org/>, and Epidemiology at <http://www.epidem.com/>). Information on the STROBE Initiative is  
27 available at <http://www.strobe-statement.org>.  
28  
29  
30  
31  
32  
33  
34  
35  
36  
37  
38  
39  
40  
41  
42  
43  
44  
45  
46  
47  
48  
49  
50  
51  
52  
53  
54  
55  
56  
57  
58  
59  
60

# BMJ Open

## What is the effect of prolonged sitting and physical activity on thoracic spinal mobility? An observational study of young adults in a UK university setting

|                                 |                                                                                                                                                                                                                                                                                                                                                                                                                                                                                                                                                                                                                                                      |
|---------------------------------|------------------------------------------------------------------------------------------------------------------------------------------------------------------------------------------------------------------------------------------------------------------------------------------------------------------------------------------------------------------------------------------------------------------------------------------------------------------------------------------------------------------------------------------------------------------------------------------------------------------------------------------------------|
| Journal:                        | <i>BMJ Open</i>                                                                                                                                                                                                                                                                                                                                                                                                                                                                                                                                                                                                                                      |
| Manuscript ID                   | bmjopen-2017-019371.R1                                                                                                                                                                                                                                                                                                                                                                                                                                                                                                                                                                                                                               |
| Article Type:                   | Research                                                                                                                                                                                                                                                                                                                                                                                                                                                                                                                                                                                                                                             |
| Date Submitted by the Author:   | 02-Feb-2018                                                                                                                                                                                                                                                                                                                                                                                                                                                                                                                                                                                                                                          |
| Complete List of Authors:       | Heneghan, Nicola; University of Birmingham, Centre of Precision Rehabilitation for Spinal Pain, School of Sport, Exercise and Rehabilitation Sciences<br>Baker, Gemma; Sandwell and West Birmingham Hospitals NHS Trust, Physiotherapy<br>Thomas, Kimberley ; Heart of England NHS Foundation Trust, Physiotherapy, Solihull Hospital<br>Falla, Deborah; University of Birmingham, Centre of Precision Rehabilitation for Spinal Pain, School of Sport, Exercise and Rehabilitation Sciences<br>Rushton, Alison; University of Birmingham, Centre of Precision Rehabilitation for Spinal Pain, School of Sport, Exercise and Rehabilitation Sciences |
| <b>Primary Subject Heading</b>: | Rehabilitation medicine                                                                                                                                                                                                                                                                                                                                                                                                                                                                                                                                                                                                                              |
| Secondary Subject Heading:      | Sports and exercise medicine, Evidence based practice                                                                                                                                                                                                                                                                                                                                                                                                                                                                                                                                                                                                |
| Keywords:                       | physical activity, spine mobility, spinal pain, sedentary behaviour, thoracic spine                                                                                                                                                                                                                                                                                                                                                                                                                                                                                                                                                                  |
|                                 |                                                                                                                                                                                                                                                                                                                                                                                                                                                                                                                                                                                                                                                      |

SCHOLARONE™  
Manuscripts

**TITLE**

What is the effect of prolonged sitting and physical activity on thoracic spinal mobility? An observational study of young adults in a UK university setting

**Authors**

Heneghan NR, Baker G, Thomas K, Falla D, Rushton A

**Affiliations**

Dr Nicola Heneghan

Lecturer Physiotherapy

Centre of Precision Rehabilitation for Spinal Pain

School of Sport, Exercise and Rehabilitation Sciences

University of Birmingham

Birmingham, West Midlands

UK

Miss Gemma Baker

Physiotherapist

Sandwell and West Birmingham Trust

Birmingham, West Midlands

UK

Miss Kimberley Thomas

Physiotherapist

Solihull Hospital

Heart of England NHS Foundation Trust

Birmingham, West Midlands

UK

Professor Deborah Falla

Professor in Rehabilitation Science and Physiotherapy



1  
2  
3 Centre of Precision Rehabilitation for Spinal Pain  
4  
5 School of Sport, Exercise and Rehabilitation Sciences  
6  
7 University of Birmingham  
8  
9 Birmingham, West Midlands  
10  
11 UK  
12  
13  
14

15 Dr Alison Rushton Reader in Musculoskeletal Rehabilitation Sciences  
16  
17 Centre of Precision Rehabilitation for Spinal Pain  
18  
19 School of Sport, Exercise and Rehabilitation Sciences  
20  
21 University of Birmingham  
22  
23 Birmingham, West Midlands  
24  
25 UK  
26  
27

28 Correspondence:

29  
30 Nicola R Heneghan

31  
32 Centre of Precision Rehabilitation for Spinal Pain (CPR Spine),

33  
34 **School of Sport, Exercise & Rehabilitation Sciences**

35  
36 University of Birmingham, Edgbaston,

37  
38 Birmingham. B15 2TT. UK

39  
40 Email: [n.heneghan@bham.ac.uk](mailto:n.heneghan@bham.ac.uk)

41  
42 Tel: +44 121 415 8367  
43  
44  
45

46 **Keywords**

47  
48 Sedentary behaviour, physical activity, thoracic spine, spinal mobility, spinal pain  
49

50 **Word count**

51  
52 2517  
53  
54  
55  
56  
57

**ABSTRACT****Objective**

Sedentary behaviour has long been associated with neck and low back pain, although relatively little is known about the thoracic spine. Contributing considerably to functional neck movement, understanding the effect of sedentary behaviour and physical activity on thoracic spinal mobility may guide clinical practice and inform research of novel interventions in spinal pain research.

**Design**

An assessor blinded prospective observational study designed and reported in accordance with STROBE.

**Setting**

UK university (June to September 2016)

**Participants**

A convenience sample (18-30 years) was recruited and, based on self-reported behaviours, were assigned to one of three groups: Group 1, sitters: sitting >7 hours/day + physical activity < 150 minutes/week; Group 2, physically active: moderate exercise >150 minutes/week + sitting < 4 hours/day, and Group 3, low activity: sitting 2-7 hours/day + physical activity <150 minutes/week.

**Outcome Measures**

Thoracic mobility was assessed in the heel-sit position using Acumar digital goniometer. Descriptive and inferential analyses were used including analysis of variance (ANOVA) and covariance (ANCOVA) for between group differences and Spearman's rank correlation for analysis of associations.

**Results**

The sample (n=92) comprised: Group 1, n=30, Group 2, n=32 and Group 3, n=30 and groups comparable with respect to age and BMI.

Thoracic spine mobility (mean [SD]) was: Group 1, sitters: 64.75[1.20], Group 2, physically active: 74.96[1.18] and Group 3, low activity: 68.44[1.22]. Significant differences in thoracic mobility were detected between the sitters and both low activity and physically active groups ( $p<0.001$ ), with an overall effect size of 0.31. Correlations between thoracic rotation and exercise duration ( $r=0.67$ ,  $p<0.001$ ), sitting duration ( $r=-0.29$ ,  $p<0.001$ ) and days exercised ( $r=0.45$ ,  $p<0.001$ ) were observed.

**Conclusions**

Findings evidence reduced thoracic mobility in individuals who spend >7 hours/day sitting and <150 minutes/week of physical activity. Further research is now required to explore possible causal relationships between activity behaviours and spinal musculoskeletal health.

## FIG

**Article summary**

- The study employed rigorous methods and validated approaches to investigate thoracic spine functional mobility
- The inclusion of accelerometry would have been useful to verify self-reported behaviours
- Whilst the study sample size was based on *a priori* power calculation of the primary outcome, a validated measure of thoracic mobility, individual group sample size was insufficient to support further post hoc analysis

## INTRODUCTION

### Background/rationale

Sedentary lifestyles are an undesirable hallmark of modern society affecting a significant proportion of the population [1]. Prolonged sitting (a form of sedentary behaviour) has progressively become the norm with computerisation in the work place, transportation modernisation, and advances in domestic technology [2]. These developments are not only detrimental for physiological health and wellbeing with rising levels of obesity, diabetes, and cardiovascular disease [3], but also musculoskeletal health and well-being with recent research finding an association between prolonged sitting (>8 hours a day) and increased neck-shoulder [4-7] and low back pain [8]. It is therefore reasonable to suppose that sedentary behaviours may induce musculoskeletal changes within the relatively stiff thoracic spine; contributing towards the dysfunction in the adjacent spinal regions. The term "regional interdependence" describes a relationship whereby seemingly unrelated impairments in one anatomical region are associated with the development or persistence of pain in another [9]. Contributing to 33% and 21% of the movement occurring during neck flexion and rotation respectively [10], it is not surprising that the thoracic spine may contribute to the development of pain in surrounding the neck. Empirical evidence supports this theory, where thoracic movement dysfunction has been linked to pathologies in the neck [11] shoulder [12] and elbow [13]. Furthermore, there is a considerable body of compelling evidence to support the use of physiotherapy treatment techniques targeting the thoracic spine in clinical presentations of neck and shoulder pain [14-16]. Notwithstanding the paucity of literature exploring the influence of sedentary behaviours on the thoracic spine, one large cross sectional study (n=1886) did report a relatively high prevalence of thoracic spine pain, alongside neck and back pain in sedentary workers (36-41%), most notably in individuals with postural constraints, such as drivers and individuals unable to change tasks regularly [17]. However, the relationship between sedentary behaviour and

1  
2  
3 thoracic mobility, a proxy for spinal musculoskeletal health, contributing 80% of axial spinal trunk  
4  
5 rotation [18] has not yet been established.  
6

7  
8 Arguably those who are physically active may present with greater mobility of their thoracic  
9  
10 region where exercise promotes joint and soft tissue mobility, countering the deleterious adaptive  
11  
12 shortening of muscles and joint stiffness through static postures [19]. However, it remains unclear  
13  
14 what physical activity is comprised of in terms of; 'length of activity', 'type of activity', and 'how  
15  
16 often' the activity is performed. Physical activity has been previously defined as "more than 150  
17  
18 minutes of moderate to intense physical activity per week" [20]. However a focus on physical  
19  
20 exertion seems inadequate when considering musculoskeletal health [21], and arguably  
21  
22 biomechanical factors such as mobility and types of activity should also be considered, where some  
23  
24 physical activity have been sub classified as linear (straight-line e.g. running) or dynamic (rotational  
25  
26 e.g. tennis) in nature.  
27

28  
29 With sedentary lifestyles becoming increasingly the norm and evidence that sitting for just 1  
30  
31 hour leads to increased spinal stiffness [22] it is now important to further investigate the  
32  
33 relationship between sedentary behaviours, physical activity and thoracic spine mobility. Therefore,  
34  
35 the aim of this study was to investigate the influence of prolonged sitting and physical activity on  
36  
37 thoracic spine mobility.  
38

### 39 40 41 **Objectives**

- 42  
43 1. Investigate the influence of sedentary behaviour on thoracic spine mobility
  - 44  
45 2. Investigate the influence of physical activity on thoracic spine mobility
  - 46  
47 3. To evaluate whether a relationship exists between duration of sitting and physical activity  
48  
49 and thoracic mobility
- 50  
51  
52  
53  
54  
55  
56  
57  
58  
59  
60

## METHODS

### Design and setting

A single assessor blinded prospective observational study was conducted between April and June 2016 within a University setting; designed and reported in line with STROBE guidelines [23].

### Recruitment

Participants were recruited via email from the staff and student body of a large UK University using posters and email advertisement. Interested and eligible participants were provided with a participant information sheet, had their questions answered, and were asked to provide written informed consent. Screening against eligibility criteria was performed at the point of recruitment by a research assistant (KT).

The XXXXXXXXXXXXXXXXXXXXXXXXXXXX Ethics Committee granted ethical approval and the study was conducted according to the Declaration of Helsinki with participants able to withdraw at any point.

### Participants

Participants comprised a convenience sample of healthy asymptomatic volunteers from within a UK university population. Eligibility criteria included young adults 18-30 years, who fulfilled one of the following criteria based on Dunstan et al., [24] for sitting duration and NICE Guidelines [25] for duration of moderate intensity physical activity [26]. The sample size was based on a minimum of 30 per group to be able to detect a minimum clinically important difference (10-degrees) in thoracic spinal rotation movement between the groups, based on power 0.8 and at 5% significance level [27].

Group 1, sitters: Individuals who participate in <150 minutes of physical activity per week and sit >7 hours per day

Group 2, physically active: Individuals who participate in >150 minutes of physical activity per week and sit <4 hours per day

1  
2  
3 Group 3, low activity: Individuals who spend between 4-7 hours sitting daily and <150 minutes of  
4  
5 physical activity per week  
6  
7

8  
9 Exclusion criteria included a current or previous neuromusculoskeletal spine condition,  
10  
11 rheumatoid arthritis, current or chronic respiratory condition, pregnancy, current hip or knee  
12  
13 pathology, unable to adopt heel sit position, not fulfilling one of the criteria listed above.  
14  
15

## 16 17 18 **Procedure**

19  
20 Piloting to determine the feasibility of the protocol was performed prior to the main study.  
21  
22 For the main study, one researcher (KT) recruited, screened and took all baseline measures to  
23  
24 characterise the sample [age, gender, body mass index (BMI), exercise type/duration, sitting  
25  
26 duration]. The primary measure of interest, thoracic spine mobility, was recorded by a blinded  
27  
28 assessor (GB) with the participant in a heel-sit position [28, 29] (Figures 1 and 2). Following  
29  
30 familiarisation and 3 practice attempts from a position of full right to left rotation to ensure stability  
31  
32 of measures [27], the end range position of the 4th rotation was measured 3 times using an Acumar  
33  
34 digital inclinometer placed over the C7-T1 interspinous space [27, 29]. The mean of the 3 measures  
35  
36 for full right and left rotation were recorded and retained for data analysis [27].  
37  
38  
39  
40  
41  
42  
43  
44  
45

46  
47  
48  
49  
50  
51  
52  
53  
54  
55  
56  
57  
58  
59  
60  
**Insert Figure 1 and 2**

## 61 62 63 **Outcome measure**

64  
65 The Acumar digital inclinometer (Acumar, Model ACU 360, Lafayette Instrument Company,  
66  
67 Indiana, USA) was used to measure thoracic rotation. The heel-sit position was chosen to minimise  
68  
69 concurrent movement occurring in the relatively mobile lumbar spine, a limitation of sitting where  
70  
71 rotation comprises motion from both regions [28]. Reliability (ICC<sub>2,1</sub> [95% confidence interval], 0.88

1  
2  
3 [0.78, 0.93]) and strong criterion ( $r=0.88$ ) and concurrent validity ( $r=0.98$ ) against a combined  
4  
5 imaging and motion analysis approach has previously been established [28, 29].  
6  
7

### 8 9 **Bias**

10  
11 A number of measures were put in place to minimise the influence of bias, including use of a  
12  
13 validated measurement approach [29], standardisation of procedures through training of assessor,  
14  
15 assessor blinding, controlling for environmental variables, avoidance of physical activity prior to  
16  
17 testing, partial blinding of participants in that they were not made aware of *a priori* planned  
18  
19 comparison between groups and piloting of all procedures in advance of the main study.  
20  
21  
22

### 23 24 **Statistical methods**

25  
26 Data were transferred to SPSS (version 22, IBM, New York, NY) and checked to ensure their  
27  
28 integrity by two researchers. Descriptive statistical analyses included a summary of participant  
29  
30 characteristics (age, gender, BMI, types of exercise, duration of exercise and sitting) using means,  
31  
32 standard deviations. Inferential analysis initially included one-way analysis of variance (ANOVA) to  
33  
34 explore between group differences, and *post hoc* comparisons to explore between group  
35  
36 differences. Effect size (eta squared) was calculated, and interpreted using Cohen's classification  
37  
38 [30].  
39

40  
41 Further inferential analyses included an analysis of co-variance (ANCOVA) to determine main  
42  
43 effects including Bonferroni correction (with pairwise comparisons) to evaluate between group  
44  
45 differences in thoracic spine mobility with gender as a covariate (as groups were imbalanced with  
46  
47 respect to gender). Spearman's rank correlation was used to evaluate relationships between  
48  
49 thoracic mobility and self-reported measures of sitting duration, days active, and physical activity.  
50  
51 For all analyses statistical significance was set at  $p<0.05$ .  
52  
53  
54  
55  
56  
57  
58  
59  
60



## RESULTS

### Participants, descriptive data and outcome data

From 109 potentially eligible participants, a total of 92 participants meet the eligibility requirements and were recruited. Baseline characteristics, self-reported behaviours for physical activity (exercise duration and types of exercise), and sitting duration are presented in Table 1. Groups were comparable with respect to age and BMI ( $p>0.05$ ), but not for gender with more women were recruited to the low activity and sitter group.

**Table 1: Participant characteristics**

|                                                                    | <b>Group 1<br/>Sitters<br/>n=30</b> | <b>Group 2<br/>Physically<br/>active n=32</b> | <b>Group 3<br/>Low activity<br/>n=30</b> |
|--------------------------------------------------------------------|-------------------------------------|-----------------------------------------------|------------------------------------------|
| <b>Age</b> in years, mean (SD)                                     | 22.73 (2.92)                        | 22.03 (2.65)                                  | 20.93 (2.49)                             |
| <b>Gender</b> (Women %)                                            | 63.3 <sup>s</sup>                   | 47.0 <sup>s</sup>                             | 76.7 <sup>s</sup>                        |
| <b>BMI</b> , mean (SD)                                             | 22.90 (2.47)                        | 23.12 (2.92)                                  | 22.60 (2.36)                             |
| <b>Thoracic rotation</b> degrees mean (SD) 95% Confidence interval | 64.74 (8.93)<br>62.37, 67.14        | 74.96 (8.26)<br>72.61,<br>77.31               | 68.44 (4.36)<br>66.02, 70.86             |
| <b>Exercise duration</b> (minutes)                                 |                                     |                                               |                                          |
| 0-30                                                               | 7                                   | -                                             | 3                                        |
| 30-60                                                              | 4                                   | -                                             | 6                                        |
| 60-90                                                              | 15                                  | -                                             | 5                                        |
| 90-150                                                             | 4                                   | -                                             | 16                                       |
| 150-180                                                            | -                                   | 4                                             | -                                        |
| 180-210                                                            | -                                   | 12                                            | -                                        |
| 210-240                                                            | -                                   | 5                                             | -                                        |
| 240+                                                               | -                                   | 11                                            | -                                        |
| <b>Types of exercise</b> (frequency)                               |                                     |                                               |                                          |
| Gym cardio                                                         | 6                                   | 10                                            | 1                                        |
| Gym weights                                                        | 5                                   | 3                                             | 9                                        |
| Running                                                            | 10                                  | 6                                             | -                                        |
| Cycling                                                            | 3                                   | 1                                             | 3                                        |
| Dance/gymnastics                                                   | -                                   | 3                                             | 1                                        |
| Football                                                           | -                                   | 4                                             | 2                                        |
| Netball/basketball                                                 | -                                   | 1                                             | 1                                        |
| Tennis                                                             | -                                   | 3                                             | 2                                        |
| Rowing                                                             | -                                   | 1                                             | -                                        |
| Martial arts                                                       | 1                                   | -                                             | -                                        |
| Other                                                              | 3                                   | -                                             | 11                                       |
| None                                                               | 2                                   | -                                             | -                                        |
| <b>Sitting duration</b> (hours)                                    |                                     |                                               |                                          |
| 0-2                                                                | -                                   | 1                                             | -                                        |
| 2-4                                                                | -                                   | 5                                             | 6                                        |

|   |      |   |    |    |
|---|------|---|----|----|
| 1 |      |   |    |    |
| 2 |      |   |    |    |
| 3 | 4-6  | - | 11 | 17 |
| 4 | 6-7  | - | 15 | 7  |
| 5 | 7-8  | 9 | -  | -  |
| 6 | 8-9  | 9 | -  | -  |
| 7 | 9-10 | 6 | -  | -  |
| 8 | 10+  | 6 | -  | -  |

§ Statistically different  $p < 0.001$

9

10

11

12

13

### Main results

14

15

16

17

18

19

20

21

22

23

24

25

26

27

28

29

30

31

32

33

34

35

36

37

38

39

40

41

42

43

44

45

46

47

48

49

50

51

52

53

54

55

56

57

58

59

60

Thoracic spine mobility (mean, SD and 95% CI) for the sitters, physically active and low activity groups were  $64.74 \pm 6.33$  ( $62.37, 67.14^\circ$ ),  $75.12 \pm 8.26$  ( $72.61, 77.31^\circ$ ),  $68.28 \pm 4.36$  ( $66.02, 70.86^\circ$ ) respectively (Figure 3).

Results from the ANOVA showed a statistically significant difference in thoracic mobility between groups [ $F(2,56) = 20.19$ ,  $P < 0.001$ ], with a large effect size of 0.31. *Post hoc* comparisons of group mean scores indicated significant differences between Group 3, low activity and Group 2, physically active (6.84-degrees,  $p < 0.001$ ), between Group 2, physically active and Group 1, sitters (10.38 degrees,  $p < 0.001$ ), although not between the Group 3, low activity and Group 1, sitters (3.54 degrees).

A one-way ANCOVA was conducted having checked data met the assumptions to compare thoracic mobility between groups, whilst controlling for gender. There was a significant difference between groups [ $F(2,88) = 18.66$ ,  $P < 0.001$ ] with the *post hoc* analyses confirming differences between Group 3, low activity and Group 2, physically active ( $p < 0.001$ ), and between Group 2, physically active and Group 1, sitters ( $p < 0.001$ ), although not between Group 3, low activity and Group 1, sitters.

**Insert Figure 3**

### Other analyses: Correlational analysis

Across the whole sample, a moderate positive correlation was found between thoracic mobility and exercise duration ( $r = 0.62$ ,  $p < 0.001$ ), a low negative correlation between thoracic

1  
2  
3 mobility and sitting duration ( $r=-0.25$ ,  $p<0.05$ ) and a low positive correlation between thoracic  
4  
5 mobility and number of days exercised ( $r=0.15$ ,  $p<0.001$ ).  
6  
7  
8  
9

## 10 **DISCUSSION**

### 11 **Key results**

12  
13  
14 This is the first rigorous observational study to investigate sedentary behaviour, physical  
15  
16 activity and thoracic spine mobility in young adults. Whilst no causal relationship can be inferred  
17  
18 from this study, findings including a large effect size, provide preliminary evidence to posit a  
19  
20 beneficial effect of physical activity and the deleterious effects of sitting on thoracic mobility, a proxy  
21  
22 for spinal musculoskeletal health.  
23

### 24 **Interpretation**

25  
26  
27 The low activity group contained the highest percentage of women, with more than half the  
28  
29 group involved in 90-150 minutes of physical activity and 4-6 hours sitting duration a week. Failing to  
30  
31 meet the national guidelines for exercise [31] does appear to impact thoracic mobility, compared to  
32  
33 those who are fulfilling the recommendations of >150 minutes of moderate physical activity per  
34  
35 week [25] and sit for less than 4 hours per day [24]. In contrast, the findings from the physically  
36  
37 active group endorse the Public Health England [31] recommendation that exercise is beneficial for  
38  
39 musculoskeletal health, with those involved in moderate physical activity having significantly greater  
40  
41 thoracic mobility than those who are more sedentary. There is persuasive evidence from this study  
42  
43 of a relationship between prolonged sitting and thoracic mobility, with >10° less mobility for the  
44  
45 sitters compared to those who were physically active. Moreover, with sitters having approximately  
46  
47 4° less mobility than those in the low activity group, our findings also support the need further  
48  
49 investigation of not only increased levels of physical activity, but also reduced sitting duration for  
50  
51 optimal spinal musculoskeletal health. Although the majority of individuals in the low activity group  
52  
53 sit between 4-7 hours a day (comparable to the findings of the physical activity group), it appears  
54  
55 that some physical activity, albeit less than the recommended guidelines is beneficial to offset the  
56  
57

1  
2  
3 'detrimental' effects of sitting; with those in the low activity group having >6° less thoracic mobility  
4  
5 than those in the physically activity group.  
6

7         These findings lend support for those young adults who comply with national guidelines on  
8  
9 physical activity [25] having better musculoskeletal health. Findings also support the need to further  
10  
11 investigate types of physical activity, where consideration is made specifically to biomechanical as  
12  
13 well as physiological parameters of physical activity such as exercise intensity. With evidence of  
14  
15 associations between thoracic mobility and exercise duration (positive), number of days exercised  
16  
17 (positive) and sitting duration (negative), further research is now required to investigate the  
18  
19 potentially causal relationship of reduced thoracic mobility leading to musculoskeletal complaints  
20  
21 such as neck, thoracic and low back pain.  
22

### 23 **Strengths and limitations**

24  
25         Reported in line with STROBE and employing rigorous methods, including assessor blinding,  
26  
27 we have established differences in thoracic mobility in a large population of young adults. Whilst  
28  
29 self-reported measures of physical activity and sitting duration potentially lead to under- or over-  
30  
31 estimation of sitting and physical activity behaviours, they are able to capture information relating to  
32  
33 activities which are not compatible or insensitive to accelerometry such as water based activity or  
34  
35 cycling and stair climbing respectively [32].  
36  
37

38  
39         Although not examined here, patterns of sitting are a potentially important consideration in  
40  
41 future studies, where breaks have been shown to be beneficial on pro-inflammatory markers; linked  
42  
43 to development of neck-shoulder pain [7]. Moreover, future studies could also usefully evaluate  
44  
45 other sitting parameters where constrained or poor postures, ergonomic parameters e.g. keyboard  
46  
47 position, may place greater loads on musculoskeletal tissues [17, 33-35].  
48

### 49 **Generalisability**

50  
51         To enable generalisability to different populations further studies are required with different  
52  
53 age groups and individuals from a range of socio-demographic backgrounds. However it is likely that  
54  
55 this population comprising young adults are an at 'risk' group for developing future musculoskeletal  
56  
57

1  
2  
3 complaints, with many likely to work in occupations where a substantial periods of time will be  
4 sitting [7]. Moreover this population represent a group where there is potential to influence thoracic  
5 mobility, with spinal degenerative changes often developing at and beyond the third decade [36]  
6 and therefore likely less responsive to physical therapy interventions targeting stiff joints and  
7 muscles.  
8  
9  
10  
11  
12  
13  
14

## 15 CONCLUSION

16  
17 This study provides evidence of reduced thoracic mobility in individuals who spend >7 hours  
18 a day sitting and <150 minutes of physical activity a week. With observed associations between  
19 thoracic mobility and exercise and sitting duration, further research is now required to explore the  
20 possible causal relationship between physical activity behaviours on spinal musculoskeletal health  
21 and subsequently their relationship to spinal complaints.  
22  
23  
24  
25  
26  
27  
28  
29  
30

31 **Figure 1.** Starting position of the heel-sit position

32 **Figure 2.** Thoracic rotation moving and measurement being taken

33 **Figure 3.** Thoracic mobility measured from all participants classified as either low activity, physically  
34 active or sitters  
35  
36  
37  
38  
39  
40  
41  
42

43 **Contribution statement:** NH was the chief investigator leading the study design, analyses and  
44 dissemination. KT and GB conducted data collection and preliminary analyses. All authors (NH, GB,  
45 KT, DF, AR) contributed to analysis and interpretation of results, conclusions and dissemination. NH  
46 drafted the initial manuscript. All authors have read, contributed to and agreed on the final  
47 manuscript.  
48  
49  
50  
51  
52  
53

54 **Competing Interests Statement:** All authors have completed the ICMJE uniform disclosure form at  
55 [www.icmje.org/coi\\_disclosure.pdf](http://www.icmje.org/coi_disclosure.pdf) and declare: no support from any organisation for the submitted  
56  
57

work; no financial relationships with any organisations that might have an interest in the submitted work in the previous three years; no other relationships or activities that could appear to have influenced the submitted work.

**Funding:** None

**Data sharing:** Raw data is held by the lead author at the University of Birmingham in accordance with guidelines. Data is available by contacting the lead author at [n.heneghan@bham.ac.uk](mailto:n.heneghan@bham.ac.uk)

## REFERENCES

1. Owen N, *Sedentary behavior: understanding and influencing adults' prolonged sitting time*. *Prev Med*, 2012. **55**(6): p. 535-539.
2. Owen N, et al., *Too Much Sitting: The population-health science of sedentary behaviour* Exercise and Sports Sciences Reviews, 2010. **38**(3): p. 105-113.
3. Wilmot, E.G., et al., *Sedentary time in adults and the association with diabetes, cardiovascular disease and death: systematic review and meta-analysis*. *Diabetologia*, 2012. **55**(11): p. 2895-2905.
4. Ariens G, et al., *Are neck flexion, neck rotation, and sitting at work risk factors for neck pain? Results of a prospective cohort study*. *Occup Environ Med*, 2001. **58**(3): p. 200-207.
5. Hallman DM, et al., *Association between objectively measured sitting time and neck-shoulder pain among blue-collar workers*. *Int Arch Occup Environ Health*, 2015. **88**(8): p. 1031-42.
6. Straker, L.M., O'Sullivan, P.B., Smith, A.J. and Perry, M.C., *Relationships between prolonged neck/shoulder pain and sitting spinal posture in male and female adolescents*. *Manual Therapy*, 2009. **14**: p. 321-329.
7. Hallman DM, et al., *Temporal patterns of sitting at work are associated with neck-shoulder pain in blue-collar workers: a cross-sectional analysis of accelerometer data in the DPHACTO study*. *Int Arch Occup Environ Health*, 2016. **89**(5): p. 823-33.
8. Gupta N, et al., *Is objectively measured sitting time associated with low back pain? A cross-sectional investigation in the NOMAD study*. *PLoS ONE [Electronic Resource]*, 2015. **10**: p. 3.
9. Sueki DG, Cleland JA, and Wainner RS, *A regional interdependence model of musculoskeletal dysfunction: research, mechanisms, and clinical implications*. *Journal of Manual and Manipulative Therapy* 2013. **21**(2): p. 90-102.
10. Tsang SM, Szeto GP, and Lee RY, *Normal kinematics of the neck: the interplay between the cervical and thoracic spines*. *Manual Therapy*, 2013. **18**(5): p. 431-7.
11. Falla D, et al., *People With Chronic Neck Pain Walk With a Stiffer Spine*. *J Orthop Sports Phys Ther*, 2017(3): p. 1-33.
12. Theisen C, et al., *Co-occurrence of outlet impingement syndrome of the shoulder and restricted range of motion in the thoracic spine--a prospective study with ultrasound-based motion analysis*. *BMC Musculoskelet Disord*, 2010(11): p. 135.
13. Berglund, A., et al., *The association between exposure to a rear-end collision and future health complaints*. *Journal of Clinical Epidemiology*, 2001. **54**(8): p. 851-856.
14. Heneghan NR and Rushton A, *Understanding why the thoracic region is the 'Cinderella' region of the spine*. *Manual Therapy*, 2016. **21**: p. 274-276.

15. Walsler RF, Meserve BB, and Boucher TR, *The effectiveness of thoracic spine manipulation for the management of musculoskeletal conditions: a systematic review and meta-analysis of randomized clinical trials*. J Man Manip Ther, 2009. **17**(4): p. 237-338.
16. Huisman PA, Speksnijder CM, and d.W. A, *The effect of thoracic spine manipulation on pain and disability in patients with non-specific neck pain: a systematic review*. Disabil Rehabil, 2013. **36**(20): p. 1677-1685.
17. Roquelaure Y, B.J., Ha C, Le Marec F, Fouquet N, Ramond-Roquin A, Goldberg M, Descatha A, Petit A, Imbernon E., *Incidence and Risk Factors for Thoracic Spine Pain in the Working Population: The French Pays de la Loire Study*. Arthritis Care Res (Hoboken), 2014. **66**(11): p. 1695-1702.
18. Fujii R, et al., *Kinematics of the lumbar spine in trunk rotation: in vivo three-dimensional analysis using magnetic resonance imaging*. Eur Spine J 2007. **16**(11): p. 1867-1874.
19. Page P, *Current concepts in muscle stretching for exercise and rehabilitation* International Journal of Sports Physical Therapy, 2012. **7**(1): p. 109-119.
20. Steene-Johannessen J, et al., *Are self-report measures able to define individuals as physically active or inactive?* Medicine & Science in Sports & Exercise, 2016. **48**: p. 235-244.
21. Hildebrandt VH, et al., *The relationship between leisure time, physical activities and musculoskeletal symptoms and disability in worker populations*. Int Arch Occup Environ Health, 2000. **73**(8): p. 507-18.
22. Beach, T.A.C., Parkinson, R.J., Stothard, P.J., and Callaghan, J.P, *Effects of prolonged sitting on the passive flexion stiffness of the in vivo lumbar spine*. The Spine Journal, 2005(5): p. 145-154.
23. von Elm E, et al., *Strengthening the Reporting of Observational Studies in Epidemiology (STROBE)statement: guidelines for reporting observational studies*. BMJ, 2007. **335**(7624): p. 806-808.
24. Dunstan DW, et al., *Too much sitting - A health hazard*. Diabetes Research and Clinical Practice, 2012. **97**: p. 368-376.
25. National Institute of Clinical Excellence. *Physical Activity: for NHS staff, patients and carers*. 2015 [cited <https://www.nice.org.uk/guidance/QS84/chapter/Quality-statement-1-Advice-for-adults-during-NHS-Health-Checks>]
26. Department of Health. *At Least Five a Week: Evidence on the impact of physical activity and its relationship to health*. 2004 [cited [http://webarchive.nationalarchives.gov.uk/+/dh.gov.uk/en/publicationsandstatistics/publications/publicationspolicyandguidance/dh\\_4080994](http://webarchive.nationalarchives.gov.uk/+/dh.gov.uk/en/publicationsandstatistics/publications/publicationspolicyandguidance/dh_4080994)].
27. Heneghan NR, et al., *Stability and intra-tester reliability of an in vivo measurement of thoracic axial rotation using an innovative methodology*. Manual Therapy, 2009. **14**(4): p. 452-455
28. Johnson KD, et al., *Reliability of thoracic spine rotation range-of-motion measurements in healthy adults*. Journal of Athletic Training, 2012. **47**(1): p. 52-60.
29. Bucke J, et al., *Validity of the digital inclinometer and iPhone when measuring thoracic rotation*. Journal of Athletic Training, 2017. **52** (9): p. 820-825.
30. Cohen J, *Statistical power analysis for the behavioural sciences*. . 1988, Hillsdale, NJ: Erlbaum.
31. Fenton K. *Preventing Musculoskeletal Disorders has wider impacts for Public Health*. Public Health Matters 2016 [cited <https://publichealthmatters.blog.gov.uk/2016/01/11/preventing-musculoskeletal-disorders-has-wider-impacts-for-public-health/>].
32. Miles L, *Physical Activity and Health*. British Nutrition Foundation Bulletin, 2007(32): p. 314-363.

- 1  
2  
3 33. Szeto GPY, Straker LM, and O.S. PB, *A comparison of symptomatic and asymptomatic office*  
4 *workers performing monotonous keyboard work -2: Neck and shoulder kinematics.* Manual  
5 *Therapy*, 2005. **10**(4): p. 281-291.
- 6 34. Hoe VC, et al., *Ergonomic design and training for preventing work-related musculoskeletal*  
7 *disorders of the upper limb and neck in adults.* Cochrane Database Syst Rev, 2012. **15**(8): p.  
8 CD008570.
- 9 35. Jun D, et al., *Physical risk factors for developing non-specific neck pain in office workers: a*  
10 *systematic review and meta-analysis.* Int Arch Occup Environ Health, 2017. **21**.
- 11 36. Edmonston SJ and Singer KP, *Thoracic spine: anatomical and biomechanical considerations*  
12 *for manual therapy.* Manual Therapy, 1997. **2**(3): p. 132-143.  
13  
14  
15  
16  
17  
18  
19  
20  
21  
22  
23  
24  
25  
26  
27  
28  
29  
30  
31  
32  
33  
34  
35  
36  
37  
38  
39  
40  
41  
42  
43  
44  
45  
46  
47  
48  
49  
50  
51  
52  
53  
54  
55  
56  
57  
58  
59  
60

For peer review only



STROBE Statement—Checklist of items that should be included in reports of *case-control studies*

|                              | Item No | Page number | Recommendation                                                                                                                                                                                    |
|------------------------------|---------|-------------|---------------------------------------------------------------------------------------------------------------------------------------------------------------------------------------------------|
| <b>Title and abstract</b>    | 1       | 1           | (a) Indicate the study's design with a commonly used term in the title or the abstract                                                                                                            |
|                              |         | 3           | (b) Provide in the abstract an informative and balanced summary of what was done and what was found                                                                                               |
| <b>Introduction</b>          |         |             |                                                                                                                                                                                                   |
| Background/rationale         | 2       | 5           | Explain the scientific background and rationale for the investigation being reported                                                                                                              |
| Objectives                   | 3       | 6           | State specific objectives, including any prespecified hypotheses                                                                                                                                  |
| <b>Methods</b>               |         |             |                                                                                                                                                                                                   |
| Study design                 | 4       | 7           | Present key elements of study design early in the paper                                                                                                                                           |
| Setting                      | 5       | 7           | Describe the setting, locations, and relevant dates, including periods of recruitment, exposure, follow-up, and data collection                                                                   |
| Participants                 | 6       | 7           | (a) Give the eligibility criteria, and the sources and methods of case ascertainment and control selection. Give the rationale for the choice of cases and controls                               |
|                              |         | 7           | (b) For matched studies, give matching criteria and the number of controls per case                                                                                                               |
| Variables                    | 7       | 8           | Clearly define all outcomes, exposures, predictors, potential confounders, and effect modifiers. Give diagnostic criteria, if applicable                                                          |
| Data sources/<br>measurement | 8*      | 8           | For each variable of interest, give sources of data and details of methods of assessment (measurement). Describe comparability of assessment methods if there is more than one group              |
| Bias                         | 9       | 9           | Describe any efforts to address potential sources of bias                                                                                                                                         |
| Study size                   | 10      | 7           | Explain how the study size was arrived at                                                                                                                                                         |
| Quantitative variables       | 11      | 8           | Explain how quantitative variables were handled in the analyses. If applicable, describe which groupings were chosen and why                                                                      |
| Statistical methods          | 12      | 9           | (a) Describe all statistical methods, including those used to control for confounding                                                                                                             |
|                              |         |             | (b) Describe any methods used to examine subgroups and interactions                                                                                                                               |
|                              |         |             | (c) Explain how missing data were addressed                                                                                                                                                       |
|                              |         |             | (d) If applicable, explain how matching of cases and controls was addressed                                                                                                                       |
|                              |         |             | (e) Describe any sensitivity analyses                                                                                                                                                             |
| <b>Results</b>               |         |             |                                                                                                                                                                                                   |
| Participants                 | 13*     | 10          | (a) Report numbers of individuals at each stage of study—eg numbers potentially eligible, examined for eligibility, confirmed eligible, included in the study, completing follow-up, and analysed |
|                              |         |             | (b) Give reasons for non-participation at each stage                                                                                                                                              |
|                              |         |             | (c) Consider use of a flow diagram                                                                                                                                                                |
| Descriptive data             | 14*     | 10          | (a) Give characteristics of study participants (eg demographic, clinical, social) and information on exposures and potential confounders                                                          |
|                              |         |             | (b) Indicate number of participants with missing data for each variable of interest                                                                                                               |
| Outcome data                 | 15*     | 10          | Report numbers in each exposure category, or summary measures of                                                                                                                                  |

|    |              |    |                                                                         |
|----|--------------|----|-------------------------------------------------------------------------|
| 1  |              |    | exposure                                                                |
| 2  |              |    |                                                                         |
| 3  | Main results | 16 | 11                                                                      |
| 4  |              |    | (a) Give unadjusted estimates and, if applicable, confounder-adjusted   |
| 5  |              |    | estimates and their precision (eg, 95% confidence interval). Make clear |
| 6  |              |    | which confounders were adjusted for and why they were included          |
| 7  |              |    | (b) Report category boundaries when continuous variables were           |
| 8  |              |    | categorized                                                             |
| 9  |              |    | (c) If relevant, consider translating estimates of relative risk into   |
| 10 |              |    | absolute risk for a meaningful time period                              |
| 11 |              |    |                                                                         |
| 12 |              |    |                                                                         |
| 13 |              |    |                                                                         |
| 14 |              |    |                                                                         |
| 15 |              |    |                                                                         |
| 16 |              |    |                                                                         |
| 17 |              |    |                                                                         |
| 18 |              |    |                                                                         |
| 19 |              |    |                                                                         |
| 20 |              |    |                                                                         |
| 21 |              |    |                                                                         |
| 22 |              |    |                                                                         |
| 23 |              |    |                                                                         |
| 24 |              |    |                                                                         |
| 25 |              |    |                                                                         |
| 26 |              |    |                                                                         |
| 27 |              |    |                                                                         |
| 28 |              |    |                                                                         |
| 29 |              |    |                                                                         |
| 30 |              |    |                                                                         |
| 31 |              |    |                                                                         |
| 32 |              |    |                                                                         |
| 33 |              |    |                                                                         |
| 34 |              |    |                                                                         |
| 35 |              |    |                                                                         |
| 36 |              |    |                                                                         |
| 37 |              |    |                                                                         |
| 38 |              |    |                                                                         |
| 39 |              |    |                                                                         |
| 40 |              |    |                                                                         |
| 41 |              |    |                                                                         |
| 42 |              |    |                                                                         |
| 43 |              |    |                                                                         |
| 44 |              |    |                                                                         |
| 45 |              |    |                                                                         |
| 46 |              |    |                                                                         |
| 47 |              |    |                                                                         |
| 48 |              |    |                                                                         |
| 49 |              |    |                                                                         |
| 50 |              |    |                                                                         |
| 51 |              |    |                                                                         |
| 52 |              |    |                                                                         |
| 53 |              |    |                                                                         |
| 54 |              |    |                                                                         |
| 55 |              |    |                                                                         |
| 56 |              |    |                                                                         |
| 57 |              |    |                                                                         |
| 58 |              |    |                                                                         |
| 59 |              |    |                                                                         |
| 60 |              |    |                                                                         |

|                          |    |    |    |                                                                                                                                                                            |
|--------------------------|----|----|----|----------------------------------------------------------------------------------------------------------------------------------------------------------------------------|
| Other analyses           | 17 | 7  |    | Report other analyses done—eg analyses of subgroups and interactions, and sensitivity analyses                                                                             |
| <b>Discussion</b>        |    |    |    |                                                                                                                                                                            |
| Key results              | 18 | 7  | 11 | Summarise key results with reference to study objectives                                                                                                                   |
| Limitations              | 19 | 9  | 13 | Discuss limitations of the study, taking into account sources of potential bias or imprecision. Discuss both direction and magnitude of any potential bias                 |
| Interpretation           | 20 | 8  | 12 | Give a cautious overall interpretation of results considering objectives, limitations, multiplicity of analyses, results from similar studies, and other relevant evidence |
| Generalisability         | 21 | 9  | 13 | Discuss the generalisability (external validity) of the study results                                                                                                      |
| <b>Other information</b> |    |    |    |                                                                                                                                                                            |
| Funding                  | 22 | 10 | 14 | Give the source of funding and the role of the funders for the present study and, if applicable, for the original study on which the present article is based              |

\*Give information separately for cases and controls.

**Note:** An Explanation and Elaboration article discusses each checklist item and gives methodological background and published examples of transparent reporting. The STROBE checklist is best used in conjunction with this article (freely available on the Web sites of PLoS Medicine at <http://www.plosmedicine.org/>, Annals of Internal Medicine at <http://www.annals.org/>, and Epidemiology at <http://www.epidem.com/>). Information on the STROBE Initiative is available at <http://www.strobe-statement.org>.

# BMJ Open

## What is the effect of prolonged sitting and physical activity on thoracic spinal mobility? An observational study of young adults in a UK university setting

|                                 |                                                                                                                                                                                                                                                                                                                                                                                                                                                                                                                                                                                                                                                      |
|---------------------------------|------------------------------------------------------------------------------------------------------------------------------------------------------------------------------------------------------------------------------------------------------------------------------------------------------------------------------------------------------------------------------------------------------------------------------------------------------------------------------------------------------------------------------------------------------------------------------------------------------------------------------------------------------|
| Journal:                        | <i>BMJ Open</i>                                                                                                                                                                                                                                                                                                                                                                                                                                                                                                                                                                                                                                      |
| Manuscript ID                   | bmjopen-2017-019371.R2                                                                                                                                                                                                                                                                                                                                                                                                                                                                                                                                                                                                                               |
| Article Type:                   | Research                                                                                                                                                                                                                                                                                                                                                                                                                                                                                                                                                                                                                                             |
| Date Submitted by the Author:   | 06-Apr-2018                                                                                                                                                                                                                                                                                                                                                                                                                                                                                                                                                                                                                                          |
| Complete List of Authors:       | Heneghan, Nicola; University of Birmingham, Centre of Precision Rehabilitation for Spinal Pain, School of Sport, Exercise and Rehabilitation Sciences<br>Baker, Gemma; Sandwell and West Birmingham Hospitals NHS Trust, Physiotherapy<br>Thomas, Kimberley ; Heart of England NHS Foundation Trust, Physiotherapy, Solihull Hospital<br>Falla, Deborah; University of Birmingham, Centre of Precision Rehabilitation for Spinal Pain, School of Sport, Exercise and Rehabilitation Sciences<br>Rushton, Alison; University of Birmingham, Centre of Precision Rehabilitation for Spinal Pain, School of Sport, Exercise and Rehabilitation Sciences |
| <b>Primary Subject Heading</b>: | Rehabilitation medicine                                                                                                                                                                                                                                                                                                                                                                                                                                                                                                                                                                                                                              |
| Secondary Subject Heading:      | Sports and exercise medicine, Evidence based practice                                                                                                                                                                                                                                                                                                                                                                                                                                                                                                                                                                                                |
| Keywords:                       | physical activity, spine mobility, spinal pain, sedentary behaviour, thoracic spine                                                                                                                                                                                                                                                                                                                                                                                                                                                                                                                                                                  |
|                                 |                                                                                                                                                                                                                                                                                                                                                                                                                                                                                                                                                                                                                                                      |

SCHOLARONE™  
Manuscripts

**TITLE**

What is the effect of prolonged sitting and physical activity on thoracic spinal mobility? An observational study of young adults in a UK university setting

**Authors**

Heneghan NR, Baker G, Thomas K, Falla D, Rushton A

**Affiliations**

Dr Nicola Heneghan

Lecturer Physiotherapy

Centre of Precision Rehabilitation for Spinal Pain

School of Sport, Exercise and Rehabilitation Sciences

University of Birmingham

Birmingham, West Midlands

UK

Miss Gemma Baker

Physiotherapist

Sandwell and West Birmingham Trust

Birmingham, West Midlands

UK

Miss Kimberley Thomas

Physiotherapist

Solihull Hospital

Heart of England NHS Foundation Trust

Birmingham, West Midlands

UK

Professor Deborah Falla

Professor in Rehabilitation Science and Physiotherapy

1  
2  
3 Centre of Precision Rehabilitation for Spinal Pain  
4  
5 School of Sport, Exercise and Rehabilitation Sciences  
6  
7 University of Birmingham  
8  
9 Birmingham, West Midlands  
10  
11 UK  
12  
13  
14

15 Dr Alison Rushton Reader in Musculoskeletal Rehabilitation Sciences  
16  
17 Centre of Precision Rehabilitation for Spinal Pain  
18  
19 School of Sport, Exercise and Rehabilitation Sciences  
20  
21 University of Birmingham  
22  
23 Birmingham, West Midlands  
24  
25 UK  
26  
27

28 Correspondence:

29  
30 Nicola R Heneghan

31  
32 Centre of Precision Rehabilitation for Spinal Pain (CPR Spine),

33  
34 **School of Sport, Exercise & Rehabilitation Sciences**

35  
36 University of Birmingham, Edgbaston,

37  
38 Birmingham. B15 2TT. UK

39  
40 Email: [n.heneghan@bham.ac.uk](mailto:n.heneghan@bham.ac.uk)

41  
42 Tel: +44 121 415 8367  
43  
44  
45

46 **Keywords**

47  
48 Sedentary behaviour, physical activity, thoracic spine, spinal mobility, spinal pain  
49

50 **Word count**

51  
52 2536  
53  
54  
55  
56  
57

**ABSTRACT****Objective**

Sedentary behaviour has long been associated with neck and low back pain, although relatively little is known about the thoracic spine. Contributing around 33% of functional neck movement, understanding the effect of sedentary behaviour and physical activity on thoracic spinal mobility may guide clinical practice and inform research of novel interventions.

**Design**

An assessor blinded prospective observational study designed and reported in accordance with STROBE.

**Setting**

UK university (June to September 2016)

**Participants**

A convenience sample (18-30 years) was recruited and based on self-report behaviours were assigned to one of three groups: Group 1] sitters - sitting >7 hours/day + physical activity < 150 minutes/week, Group 2] physically active - moderate exercise >150 minutes/week + sitting < 4 hours/day, and Group 3] low activity - sitting 2-7 hours/day + physical activity <150 minutes/week.

**Outcome Measures**

Thoracic mobility was assessed in the heel-sit position using Acumar digital goniometer; a validated measure. Descriptive and inferential analyses included analysis of variance (ANOVA) and covariance (ANCOVA) for between group differences and Spearman's rank correlation for *post hoc* analysis of associations.

**Results**

The sample (n=92) comprised: Sitters n=30, Physically active n=32, and Low activity n=30. Groups were comparable with respect to age and BMI.

Thoracic spine mobility (mean [SD]) was; Group 1 sitters 64.75[1.20], Group 2 physically active 74.96[1.18] and Group 3 low activity 68.44[1.22]. Significant differences were detected between 1) sitters and low activity 2) sitters and physically active ( $p<0.001$ ). There was an overall effect size of 0.31. Correlations between thoracic rotation and exercise duration ( $r=0.67$ ,  $p<0.001$ ), sitting duration ( $r=-0.29$ ,  $p<0.001$ ) and days exercised ( $r=0.45$ ,  $p<0.001$ ) were observed.

**Conclusions**

Findings evidence reduced thoracic mobility in individuals who spend >7 hours/day sitting and <150 minutes/week of physical activity. Further research is required to explore possible causal relationships between activity behaviours and spinal musculoskeletal health.

## FIG

**Article summary**

- The study employed rigorous methods and validated approaches to investigate thoracic spine functional mobility
- The inclusion of accelerometry would have been useful to verify self-report behaviours
- Whilst the study sample size was based on *a priori* power calculation of the primary outcome, a validated measure of thoracic mobility, individual group sample size was insufficient to support further post hoc analysis



## INTRODUCTION

### Background/rationale

Sedentary lifestyles are an undesirable hallmark of modern society affecting a significant proportion of the population [1]. Prolonged sitting (a form of sedentary behaviour) has progressively become the norm with computerisation in the work place, transportation modernisation, and advances in domestic technology [2]. These developments are not only detrimental for physiological health and wellbeing with rising levels of obesity, diabetes, and cardiovascular disease [3], but also musculoskeletal health and well-being with recent research finding an association between prolonged sitting (>8 hours a day) and increased neck-shoulder [4-7] and low back pain [8]. It is therefore reasonable to suppose that sedentary behaviours may induce musculoskeletal changes within the relatively stiff thoracic spine; contributing towards the dysfunction in the adjacent spinal regions. The term "regional interdependence" describes a relationship whereby seemingly unrelated impairments in one anatomical region are associated with the development or persistence of pain in another [9]. Contributing to 33% and 21% of the movement occurring during neck flexion and rotation respectively [10], it is not surprising that the thoracic spine may contribute to the development of pain in surrounding the neck. Empirical evidence supports this theory, where thoracic movement dysfunction has been linked to pathologies in the neck [11] shoulder [12] and elbow [13]. Furthermore, there is a considerable body of compelling evidence to support the use of physiotherapy treatment techniques targeting the thoracic spine in clinical presentations of neck and shoulder pain [14-16]. Notwithstanding the paucity of literature exploring the influence of sedentary behaviours on the thoracic spine, one large cross sectional study (n=1886) did report a relatively high prevalence of thoracic spine pain, alongside neck and back pain in sedentary workers (36-41%), most notably in individuals with postural constraints, such as drivers and individuals unable to change tasks regularly [17]. However, the relationship between sedentary behaviour and

1  
2  
3 thoracic mobility, a proxy for spinal musculoskeletal health, contributing 80% of axial spinal trunk  
4  
5 rotation [18] has not yet been established.  
6

7  
8 Arguably those who are physically active may present with greater mobility of their thoracic region  
9  
10 where exercise promotes joint and soft tissue mobility, countering the deleterious adaptive  
11  
12 shortening of muscles and joint stiffness through static postures [19]. However, it remains unclear  
13  
14 what physical activity is comprised of in terms of; 'length of activity', 'type of activity', and 'how  
15  
16 often' the activity is performed. Physical activity has been previously defined as "more than 150  
17  
18 minutes of moderate to intense physical activity per week" [20]. However a focus on physical  
19  
20 exertion seems inadequate when considering musculoskeletal health [21], and arguably  
21  
22 biomechanical factors such as mobility and types of activity should also be considered, where some  
23  
24 physical activity have been sub classified as linear (straight-line e.g. running) or dynamic (rotational  
25  
26 e.g. tennis) in nature.  
27

28  
29 With sedentary lifestyles becoming increasingly the norm and evidence that sitting for just 1 hour  
30  
31 leads to increased spinal stiffness [22] it is now important to further investigate the relationship  
32  
33 between sedentary behaviours, physical activity and thoracic spine mobility. Therefore, the aim of  
34  
35 this study was to investigate the influence of prolonged sitting and physical activity on thoracic spine  
36  
37 mobility.  
38

### 39 40 41 **Objectives**

- 42  
43 1. Investigate the influence of sedentary behaviour on thoracic spine mobility
  - 44  
45 2. Investigate the influence of physical activity on thoracic spine mobility
  - 46  
47 3. To evaluate whether a relationship exists between duration of sitting and physical activity  
48  
49 and thoracic mobility
- 50  
51  
52  
53  
54  
55  
56  
57

## METHODS

### Design and setting

A single assessor blinded prospective observational study was conducted between April and June 2016 within a University setting; designed and reported in line with STROBE guidelines [23].

### Recruitment

Participants were recruited via email from the staff and student body of a large UK University using posters and email advertisement. Interested and eligible participants were provided with a participant information sheet, had their questions answered, and were asked to provide written informed consent. Screening against eligibility criteria was performed at the point of recruitment by a research assistant (KT).

The School of Sport, Exercise and Rehabilitation Sciences Ethics Committee granted ethical approval and the study was conducted according to the Declaration of Helsinki with participants able to withdraw at any point.

### Participants

Participants comprised a convenience sample of healthy asymptomatic volunteers from within a UK university population. Eligibility criteria included young adults 18-30 years, who fulfilled one of the following criteria based on Dunstan et al., [24] for sitting duration and NICE Guidelines [25] for duration of moderate intensity physical activity [26]. The sample size was based on a minimum of 30 per group to be able to detect a minimum clinically important difference (10-degrees) in thoracic spinal rotation movement between the groups, based on power 0.8 and at 5% significance level [27].

1. Individuals who participate in >150 minutes of physical activity per week and sit <4 hours per day (physically active)
2. Individuals who participate in <150 minutes of physical activity per week and sit >7 hours per day (sitters)

1  
2  
3 3. Individuals who spend between 4-7 hours sitting daily and <150 minutes of physical activity per  
4 week (low activity).

5  
6  
7 Exclusion criteria included a current or previous neuromusculoskeletal spine condition, rheumatoid  
8 arthritis, current or chronic respiratory condition, pregnancy, current hip or knee pathology, unable  
9 to adopt heel sit position, not fulfilling one of the criteria listed above.  
10  
11  
12

### 13 14 15 16 17 **Variables: Demographic data and outcome assessment**

#### 18 19 20 **Procedure**

21  
22 Piloting to determine the feasibility of the protocol was performed prior to the main study.  
23  
24 For the main study, one researcher (KT) recruited, screened and took all baseline measures to  
25 characterise the sample [age, gender, body mass index (BMI), exercise type/duration, sitting  
26 duration]. The primary measure of interest, thoracic spine mobility, was recorded by a blinded  
27 assessor (GB) with the participant in a heel-sit position [28, 29]. Following familiarisation and 3  
28 practice attempts from a position of full right to left rotation to ensure stability of measures [27], the  
29 end range position of the 4th rotation was measured 3 times using an Acumar digital inclinometer  
30 placed over the C7-T1 interspinous space [27, 29]. The mean of the 3 measures for full right and left  
31 rotation were recorded and retained for data analysis [27].  
32  
33  
34  
35  
36  
37  
38  
39  
40

#### 41 **Outcome measure**

42  
43 The Acumar digital inclinometer (Acumar, Model ACU 360, Lafayette Instrument Company,  
44 Indiana, USA) was used to measure thoracic rotation. The heel-sit position was chosen to minimise  
45 concurrent movement occurring in the relatively mobile lumbar spine, a limitation of sitting where  
46 rotation comprises motion from both regions [28]. Reliability (ICC<sub>2,1</sub> [95% confidence interval], 0.88  
47 [0.78, 0.93]) and strong criterion (r=0.88) and concurrent validity (r=0.98) against a combined  
48 imaging and motion analysis approach has previously been established [28, 29].  
49  
50  
51  
52  
53  
54  
55  
56  
57  
58  
59  
60

### Bias

A number of measures were put in place to minimise the influence of bias, including use of a validated measurement approach[29], standardisation of procedures through training of assessor, assessor blinding, controlling for environmental variables, avoidance of physical activity prior to testing, partial blinding of participants in that they were not made aware of *a priori* planned comparison between groups and piloting of all procedures in advance of the main study.

### Statistical methods

Data were transferred to SPSS (version 22, IBM, New York, NY) and checked to ensure their integrity by two researchers. Descriptive statistical analyses included a summary of participant characteristics (age, gender, BMI, types of exercise, duration of exercise and sitting) using means, standard deviations. Inferential analysis initially included one-way analysis of variance (ANOVA) to explore between group differences, and *post hoc* comparisons to explore between group differences. Effect size (eta squared) was calculated, and interpreted using Cohen's classification [30].

Further inferential analyses included an analysis of co-variance (ANCOVA) to determine main effects including Bonferroni correction (with pairwise comparisons) to evaluate between group differences in thoracic spine mobility with gender as a covariate (as groups were imbalanced with respect to gender). Spearman's rank correlation correlational analyses were used to evaluate relationships between thoracic mobility and self-report measures of sitting duration, days active, and physical activity. For all analyses statistical significance was set at  $p < 0.05$ .

### Patient involvement

The study was conceived from our working with patients with spinal complaints over many years and their views used to inform the design and methods used. Study findings have been disseminated to

1  
2  
3 patients and participants via conference presentations including the Centre of Precision  
4  
5 Rehabilitation for Spinal Pain, Patient and Public Involvement Group.  
6  
7

## 8 9 **RESULTS**

### 10 11 **Participants, descriptive data and outcome data**

12  
13 A total of 92 participants were recruited. Baseline characteristics, self-reported behaviours  
14  
15 for physical activity (exercise duration and types of exercise), and sitting duration are presented in  
16  
17 Table 1. Groups were comparable with respect to age and BMI ( $p>0.05$ ), but not for gender with  
18  
19 more women were recruited to the low activity and sitter group.  
20  
21  
22  
23  
24  
25  
26  
27  
28  
29  
30  
31  
32  
33  
34  
35  
36  
37  
38  
39  
40  
41  
42  
43  
44  
45  
46  
47  
48  
49  
50  
51  
52  
53  
54  
55  
56  
57  
58  
59  
60

**Table 1: Participant characteristics**

|                                                                    | <b>Sitters<br/>n=30</b>      | <b>Physically<br/>active n=32</b> | <b>Low activity<br/>n=30</b> |
|--------------------------------------------------------------------|------------------------------|-----------------------------------|------------------------------|
| <b>Age</b> in years, mean (SD)                                     | 22.73 (2.92)                 | 22.03 (2.65)                      | 20.93 (2.49)                 |
| <b>Gender</b> (Women %)                                            | 63.3 <sup>§</sup>            | 47.0 <sup>§</sup>                 | 76.7 <sup>§</sup>            |
| <b>BMI</b> , mean (SD)                                             | 22.90 (2.47)                 | 23.12 (2.92)                      | 22.60 (2.36)                 |
| <b>Thoracic rotation</b> degrees mean (SD) 95% Confidence interval | 64.74 (8.93)<br>62.37, 67.14 | 74.96 (8.26)<br>72.61,<br>77.31   | 68.44 (4.36)<br>66.02, 70.86 |
| <b>Exercise duration</b> (minutes)                                 |                              |                                   |                              |
| 0-30                                                               | 7                            | -                                 | 3                            |
| 30-60                                                              | 4                            | -                                 | 6                            |
| 60-90                                                              | 15                           | -                                 | 5                            |
| 90-150                                                             | 4                            | -                                 | 16                           |
| 150-180                                                            | -                            | 4                                 | -                            |
| 180-210                                                            | -                            | 12                                | -                            |
| 210-240                                                            | -                            | 5                                 | -                            |
| 240+                                                               | -                            | 11                                | -                            |
| <b>Types of exercise</b> (frequency)                               |                              |                                   |                              |
| Gym cardio                                                         | 6                            | 10                                | 1                            |
| Gym weights                                                        | 5                            | 3                                 | 9                            |
| Running                                                            | 10                           | 6                                 | -                            |
| Cycling                                                            | 3                            | 1                                 | 3                            |
| Dance/gymnastics                                                   | -                            | 3                                 | 1                            |
| Football                                                           | -                            | 4                                 | 2                            |
| Netball/basketball                                                 | -                            | 1                                 | 1                            |
| Tennis                                                             | -                            | 3                                 | 2                            |
| Rowing                                                             | -                            | 1                                 | -                            |
| Martial arts                                                       | 1                            | -                                 | -                            |
| Other                                                              | 3                            | -                                 | 11                           |
| None                                                               | 2                            | -                                 | -                            |
| <b>Sitting duration</b> (hours)                                    |                              |                                   |                              |
| 0-2                                                                | -                            | 1                                 | -                            |
| 2-4                                                                | -                            | 5                                 | 6                            |
| 4-6                                                                | -                            | 11                                | 17                           |
| 6-7                                                                | -                            | 15                                | 7                            |
| 7-8                                                                | 9                            | -                                 | -                            |
| 8-9                                                                | 9                            | -                                 | -                            |
| 9-10                                                               | 6                            | -                                 | -                            |
| 10+                                                                | 6                            | -                                 | -                            |

<sup>§</sup> Statistically different p<0.001

### Main results

Thoracic spine mobility (mean, SD and 95% CI) for the sitters, physically active and low activity groups were 64.74±6.33 (62.37,67.14°), 75.12±8.26 (72.61, 77.31°), 68.28±4.36 (66.02, 70.86°) respectively (Figure 1).

1  
2  
3 Results from the ANOVA showed a statistically significant difference in thoracic mobility between  
4 groups [F (2,56)=20.19 P<0.001], with a large effect size of 0.31. *Post hoc* comparisons of group  
5 mean scores indicated significant differences between the low activity and physically active groups  
6 (6.84-degrees, p<0.001), the physically active group and sitters (10.38 degrees, p<0.001), although  
7 not between the low activity and sitters (3.54 degrees).  
8  
9  
10  
11  
12

13  
14 A one-way ANCOVA was conducted having checked data met the assumptions to compare  
15 thoracic mobility between groups, whilst controlling for gender. There was a significant difference  
16 between groups [F (2,88)=18.66 P<0.001] with the *post hoc* analyses confirming differences between  
17 the low activity and physically active groups (p<0.001), the physically active group and sitters  
18 (p<0.001), although not between the low activity and sitters.  
19  
20  
21  
22  
23  
24

25 **Insert Figure 1**  
26  
27

#### 28 ***Other analyses: Correlational analysis*** 29 30

31 Across the whole sample, a moderate positive correlation was found between thoracic  
32 mobility and exercise duration (r=0.62, p<0.001), a low negative correlation between sitting duration  
33 (r=-0.25, p<0.05) and low positive correlation between number of days exercised (r=0.15, p<0.001).  
34  
35  
36  
37  
38  
39  
40  
41  
42  
43  
44  
45  
46  
47  
48  
49  
50  
51  
52  
53  
54  
55  
56  
57  
58  
59  
60



## DISCUSSION

### Key results

This is the first rigorous observational study to investigate sedentary behaviour, physical activity and thoracic spine mobility in young adults. Whilst no causal relationship can be inferred from this study, findings including a large effect size, provide preliminary evidence to posit a beneficial effect of physical activity and the deleterious effects of sitting on thoracic mobility, a proxy for spinal musculoskeletal health.

### Interpretation

The low activity group contained the highest percentage of women, with more than half the group involved in 90-150 minutes of physical activity and 4-6 hours sitting duration a week. Failing to meet the national guidelines for exercise [31] does appear to impact thoracic mobility, compared to those who are fulfilling the recommendations of >150 minutes of moderate physical activity per week [25] and sit for less than 4 hours per day [24]. In contrast, the findings from the physically active group endorse the Public Health England [31] recommendation that exercise is beneficial for musculoskeletal health, with those involved in moderate physical activity having significantly greater thoracic mobility than those who are more sedentary. There is persuasive evidence from this study of a relationship between prolonged sitting and thoracic mobility, with >10° less mobility for the sitters compared to those who were physically active. Moreover, with sitters having approximately 4° less mobility than those in the low activity group, our findings also support the need further investigation of not only increased levels of physical activity, but also reduced sitting duration for optimal spinal musculoskeletal health. Although the majority of individuals in the low activity group sit between 4-7 hours a day (comparable to the findings of the physical activity group), it appears that some physical activity, albeit less than the recommended guidelines is beneficial to offset the 'detrimental' effects of sitting; with those in the low activity group having >6° less thoracic mobility than those in the physically activity group.

1  
2  
3           These findings lend support for those young adults who comply with national guidelines on  
4 physical activity [25] having better musculoskeletal health. Findings also support the need to further  
5 investigate types of physical activity, where consideration is made specifically to biomechanical as  
6 well as physiological parameters of physical activity such as exercise intensity. With evidence of  
7 associations between thoracic mobility and exercise duration (positive), number of days exercised  
8 (positive) and sitting duration (negative), further research is now required to investigate the  
9 potentially causal relationship of reduced thoracic mobility leading to musculoskeletal complaints  
10 such as neck, thoracic and low back pain.  
11  
12  
13  
14  
15  
16  
17  
18  
19  
20  
21

### 22 **Strengths and limitations**

23  
24           Reported in line with STROBE and employing rigorous methods, including assessor blinding,  
25 we have established differences in thoracic mobility in a large population of young adults. Whilst  
26 self-reported measures of physical activity and sitting duration potentially lead to under- or over-  
27 estimation of sitting and physical activity behaviours, they are able to capture information relating to  
28 activities which are not compatible or insensitive to accelerometry such as water based activity or  
29 cycling and stair climbing respectively [32].  
30  
31  
32  
33  
34  
35

36           Although not examined here, patterns of sitting are a potentially important consideration in  
37 future studies, where breaks have been shown to be beneficial on pro-inflammatory markers; linked  
38 to development of neck-shoulder pain [7]. Moreover, future studies could also usefully evaluate  
39 other sitting parameters where constrained or poor postures, ergonomic parameters e.g. keyboard  
40 position, may place greater loads on musculoskeletal tissues [17, 33-35].  
41  
42  
43  
44  
45  
46  
47  
48

### 49 **Generalisability**

50  
51           To enable generalisability to different populations further studies are required with different  
52 age groups and individuals from a range of socio-demographic backgrounds. However it is likely that  
53 this population comprising young adults are an at 'risk' group for developing future musculoskeletal  
54  
55  
56  
57  
58  
59  
60

1  
2  
3 complaints, with many likely to work in occupations where a substantial periods of time will be  
4 sitting [7]. Moreover this population represent a group where there is potential to influence thoracic  
5 mobility, with spinal degenerative changes often developing at and beyond the third decade [36]  
6 and therefore likely less responsive to physical therapy interventions targeting stiff joints and  
7 muscles.  
8  
9  
10  
11  
12  
13  
14

## 15 CONCLUSION

16  
17 This study provides evidence of reduced thoracic mobility in individuals who spend >7 hours  
18 a day sitting and <150 minutes of physical activity a week. With observed associations between  
19 thoracic mobility and exercise and sitting duration, further research is now required to explore the  
20 possible causal relationship between physical activity behaviours on spinal musculoskeletal health  
21 and subsequently their relationship to spinal complaints.  
22  
23  
24  
25  
26  
27  
28  
29  
30

## 31 LEGEND

32  
33  
34 Figure 1: Thoracic rotational mobility across groups: sitters, physically active and low activity  
35  
36  
37  
38  
39

40 **Contribution statement:** NH was the chief investigator leading the study design, analyses and  
41 dissemination. KT and GB conducted data collection and preliminary analyses. All authors (NH, GB,  
42 KT, DF, AR) contributed to analysis and interpretation of results, conclusions and dissemination. NH  
43 drafted the initial manuscript. All authors have read, contributed to and agreed on the final  
44 manuscript.  
45  
46  
47  
48  
49

50  
51 **Competing Interests Statement:** All authors have completed the ICMJE uniform disclosure form at  
52 [www.icmje.org/coi\\_disclosure.pdf](http://www.icmje.org/coi_disclosure.pdf) and declare: no support from any organisation for the submitted  
53 work; no financial relationships with any organisations that might have an interest in the submitted  
54  
55  
56  
57

work in the previous three years; no other relationships or activities that could appear to have influenced the submitted work.

**Funding:** None

**Data sharing:** Raw data is held by the lead author at the University of Birmingham in accordance with guidelines. Data is available by contacting the lead author at [n.heneghan@bham.ac.uk](mailto:n.heneghan@bham.ac.uk)

## REFERENCES

1. Owen N, *Sedentary behavior: understanding and influencing adults' prolonged sitting time*. *Prev Med*, 2012. **55**(6): p. 535-539.
2. Owen N, et al., *Too Much Sitting: The population-health science of sedentary behaviour* *Exercise and Sports Sciences Reviews*, 2010. **38**(3): p. 105-113.
3. Wilmot, E.G., et al., *Sedentary time in adults and the association with diabetes, cardiovascular disease and death: systematic review and meta-analysis*. *Diabetologia*, 2012. **55**(11): p. 2895-2905.
4. Ariens G, et al., *Are neck flexion, neck rotation, and sitting at work risk factors for neck pain? Results of a prospective cohort study*. *Occup Environ Med*, 2001. **58**(3): p. 200-207.
5. Hallman DM, et al., *Association between objectively measured sitting time and neck-shoulder pain among blue-collar workers*. *Int Arch Occup Environ Health*, 2015. **88**(8): p. 1031-42.
6. Straker, L.M., O'Sullivan, P.B., Smith, A.J. and Perry, M.C, *Relationships between prolonged neck/shoulder pain and sitting spinal posture in male and female adolescents*. *Manual Therapy*, 2009. **14**: p. 321-329.
7. Hallman DM, et al., *Temporal patterns of sitting at work are associated with neck-shoulder pain in blue-collar workers: a cross-sectional analysis of accelerometer data in the DPHACTO study*. *Int Arch Occup Environ Health*, 2016. **89**(5): p. 823-33.
8. Gupta N, et al., *Is objectively measured sitting time associated with low back pain? A cross-sectional investigation in the NOMAD study*. *PLoS ONE [Electronic Resource]*, 2015. **10**: p. 3.
9. Sueki DG, Cleland JA, and Wainner RS, *A regional interdependence model of musculoskeletal dysfunction: research, mechanisms, and clinical implications*. *Journal of Manual and Manipulative Therapy* 2013. **21**(2): p. 90-102.
10. Tsang SM, Szeto GP, and Lee RY, *Normal kinematics of the neck: the interplay between the cervical and thoracic spines*. *Manual Therapy*, 2013. **18**(5): p. 431-7.
11. Falla D, et al., *People With Chronic Neck Pain Walk With a Stiffer Spine*. *J Orthop Sports Phys Ther*, 2017(3): p. 1-33.
12. Theisen C, et al., *Co-occurrence of outlet impingement syndrome of the shoulder and restricted range of motion in the thoracic spine--a prospective study with ultrasound-based motion analysis*. *BMC Musculoskelet Disord*, 2010(11): p. 135.
13. Berglund, A., et al., *The association between exposure to a rear-end collision and future health complaints*. *Journal of Clinical Epidemiology*, 2001. **54**(8): p. 851-856.
14. Heneghan NR and Rushton A, *Understanding why the thoracic region is the 'Cinderella' region of the spine*. *Manual Therapy*, 2016. **21**: p. 274-276.
15. Walser RF, Meserve BB, and Boucher TR, *The effectiveness of thoracic spine manipulation for the management of musculoskeletal conditions: a systematic review and meta-analysis of randomized clinical trials*. *Journal of Manual & Manipulative Therapy*, 2009. **17**(4): p. 237-338.

16. Huisman PA, Speksnijder CM, and d.W. A, *The effect of thoracic spine manipulation on pain and disability in patients with non-specific neck pain: a systematic review*. Disabil Rehabil, 2013. **36**(20): p. 1677-1685.
17. Roquelaure Y, B.J., Ha C, Le Marec F, Fouquet N, Ramond-Roquin A, Goldberg M, Descatha A, Petit A, Imbernon E., *Incidence and Risk Factors for Thoracic Spine Pain in the Working Population: The French Pays de la Loire Study*. Arthritis Care Res (Hoboken), 2014. **66**(11): p. 1695-1702.
18. Fujii R, et al., *Kinematics of the lumbar spine in trunk rotation: in vivo three-dimensional analysis using magnetic resonance imaging*. Eur Spine J 2007. **16**(11): p. 1867-1874.
19. Page P, *Current concepts in muscle stretching for exercise and rehabilitation* International Journal of Sports Physical Therapy, 2012. **7**(1): p. 109-119.
20. Steene-Johannessen J, et al., *Are self-report measures able to define individuals as physically active or inactive?* Medicine & Science in Sports & Exercise, 2016. **48**: p. 235-244.
21. Hildebrandt VH, et al., *The relationship between leisure time, physical activities and musculoskeletal symptoms and disability in worker populations*. Int Arch Occup Environ Health, 2000. **73**(8): p. 507-18.
22. Beach, T.A.C., Parkinson, R.J., Stothard, P.J., and Callaghan, J.P, *Effects of prolonged sitting on the passive flexion stiffness of the in vivo lumbar spine*. The Spine Journal, 2005(5): p. 145-154.
23. von Elm E, et al., *Strengthening the Reporting of Observational Studies in Epidemiology (STROBE)statement: guidelines for reporting observational studies*. BMJ, 2007. **335**(7624): p. 806-808.
24. Dunstan DW, et al., *Too much sitting - A health hazard*. Diabetes Research and Clinical Practice, 2012. **97**: p. 368-376.
25. National Institute of Clinical Excellence. *Physical Activity: for NHS staff, patients and carers*. 2015 [cited <https://www.nice.org.uk/guidance/QS84/chapter/Quality-statement-1-Advice-for-adults-during-NHS-Health-Checks>]
26. Department of Health. *At Least Five a Week: Evidence on the impact of physical activity and its relationship to health*. 2004 [cited [http://webarchive.nationalarchives.gov.uk/+/dh.gov.uk/en/publicationsandstatistics/publications/publicationspolicyandguidance/dh\\_4080994](http://webarchive.nationalarchives.gov.uk/+/dh.gov.uk/en/publicationsandstatistics/publications/publicationspolicyandguidance/dh_4080994)].
27. Heneghan NR, et al., *Stability and intra-tester reliability of an in vivo measurement of thoracic axial rotation using an innovative methodology*. Manual Therapy, 2009. **14**(4): p. 452-455
28. Johnson KD, et al., *Reliability of thoracic spine rotation range-of-motion measurements in healthy adults*. Journal of Athletic Training, 2012. **47**(1): p. 52-60.
29. Bucke J, et al., *Validity of the digital inclinometer and iPhone when measuring thoracic rotation*. Journal of Athletic Training, 2017. **52** (9): p. 820-825.
30. Cohen J, *Statistical power analysis for the behavioural sciences*. . 1988, Hillsdale, NJ: Erlbaum.
31. Fenton K. *Preventing Musculoskeletal Disorders has wider impacts for Public Health*. Public Health Matters 2016 [cited <https://publichealthmatters.blog.gov.uk/2016/01/11/preventing-musculoskeletal-disorders-has-wider-impacts-for-public-health/>].
32. Miles L, *Physical Activity and Health*. British Nutrition Foundation Bulletin, 2007(32): p. 314-363.
33. Szeto GPY, Straker LM, and O.S. PB, *A comparison of symptomatic and asymptomatic office workers performing monotonous keyboard work -2: Neck and shoulder kinematics*. Manual Therapy, 2005. **10**(4): p. 281-291.

- 1  
2  
3 34. Hoe VC, et al., *Ergonomic design and training for preventing work-related musculoskeletal disorders of the upper limb and neck in adults*. Cochrane Database Syst Rev, 2012. **15**(8): p. CD008570.  
4  
5  
6 35. Jun D, et al., *Physical risk factors for developing non-specific neck pain in office workers: a systematic review and meta-analysis*. Int Arch Occup Environ Health, 2017. **21**.  
7  
8 36. Edmonston SJ and Singer KP, *Thoracic spine: anatomical and biomechanical considerations for manual therapy*. Manual Therapy, 1997. **2**(3): p. 132-143.  
9  
10  
11  
12  
13  
14  
15  
16  
17  
18  
19  
20  
21  
22  
23  
24  
25  
26  
27  
28  
29  
30  
31  
32  
33  
34  
35  
36  
37  
38  
39  
40  
41  
42  
43  
44  
45  
46  
47  
48  
49  
50  
51  
52  
53  
54  
55  
56  
57  
58  
59  
60

For peer review only

1  
2  
3  
4  
5  
6  
7  
8  
9  
10  
11  
12  
13  
14  
15  
16  
17  
18  
19  
20  
21  
22  
23  
24  
25  
26  
27  
28  
29  
30  
31  
32  
33  
34  
35  
36  
37  
38  
39  
40  
41  
42  
43  
44  
45  
46  
47  
48  
49  
50  
51  
52  
53  
54  
55  
56  
57  
58  
59  
60

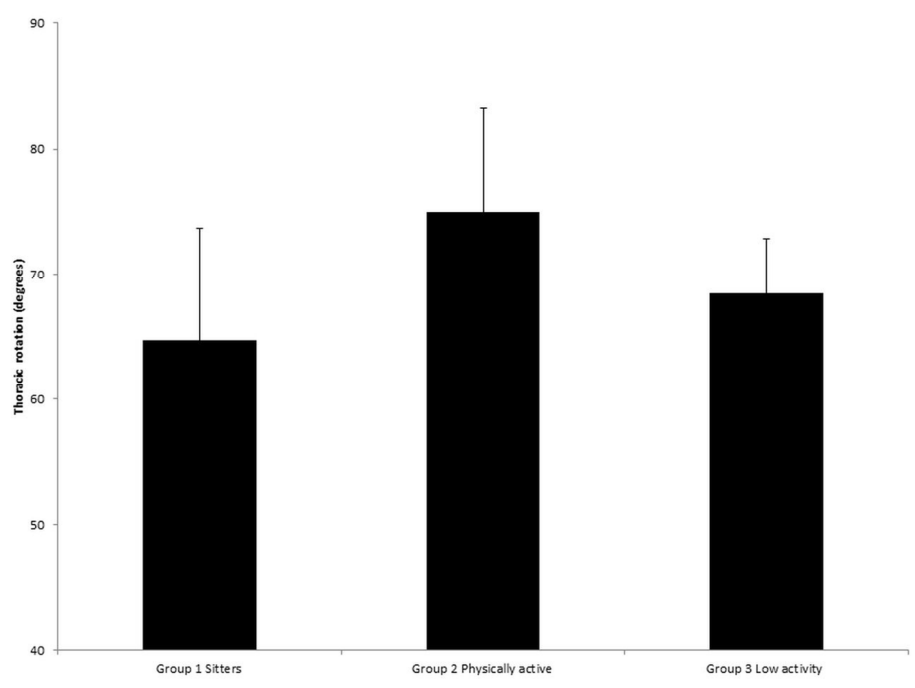

Figure 1: Thoracic rotational mobility across groups: sitters, physically active and low activity

119x90mm (300 x 300 DPI)

View only

STROBE Statement—Checklist of items that should be included in reports of *case-control studies*

|                              | Item No | Page number | Recommendation                                                                                                                                                                                    |
|------------------------------|---------|-------------|---------------------------------------------------------------------------------------------------------------------------------------------------------------------------------------------------|
| <b>Title and abstract</b>    | 1       | 1           | (a) Indicate the study's design with a commonly used term in the title or the abstract                                                                                                            |
|                              |         | 3           | (b) Provide in the abstract an informative and balanced summary of what was done and what was found                                                                                               |
| <b>Introduction</b>          |         |             |                                                                                                                                                                                                   |
| Background/rationale         | 2       | 5           | Explain the scientific background and rationale for the investigation being reported                                                                                                              |
| Objectives                   | 3       | 6           | State specific objectives, including any prespecified hypotheses                                                                                                                                  |
| <b>Methods</b>               |         |             |                                                                                                                                                                                                   |
| Study design                 | 4       | 7           | Present key elements of study design early in the paper                                                                                                                                           |
| Setting                      | 5       | 7           | Describe the setting, locations, and relevant dates, including periods of recruitment, exposure, follow-up, and data collection                                                                   |
| Participants                 | 6       | 7           | (a) Give the eligibility criteria, and the sources and methods of case ascertainment and control selection. Give the rationale for the choice of cases and controls                               |
|                              |         | 7           | (b) For matched studies, give matching criteria and the number of controls per case                                                                                                               |
| Variables                    | 7       | 8           | Clearly define all outcomes, exposures, predictors, potential confounders, and effect modifiers. Give diagnostic criteria, if applicable                                                          |
| Data sources/<br>measurement | 8*      | 8           | For each variable of interest, give sources of data and details of methods of assessment (measurement). Describe comparability of assessment methods if there is more than one group              |
| Bias                         | 9       | 9           | Describe any efforts to address potential sources of bias                                                                                                                                         |
| Study size                   | 10      | 7           | Explain how the study size was arrived at                                                                                                                                                         |
| Quantitative variables       | 11      | 8           | Explain how quantitative variables were handled in the analyses. If applicable, describe which groupings were chosen and why                                                                      |
| Statistical methods          | 12      | 9           | (a) Describe all statistical methods, including those used to control for confounding                                                                                                             |
|                              |         |             | (b) Describe any methods used to examine subgroups and interactions                                                                                                                               |
|                              |         |             | (c) Explain how missing data were addressed                                                                                                                                                       |
|                              |         |             | (d) If applicable, explain how matching of cases and controls was addressed                                                                                                                       |
|                              |         |             | (e) Describe any sensitivity analyses                                                                                                                                                             |
| <b>Results</b>               |         |             |                                                                                                                                                                                                   |
| Participants                 | 13*     | 11          | (a) Report numbers of individuals at each stage of study—eg numbers potentially eligible, examined for eligibility, confirmed eligible, included in the study, completing follow-up, and analysed |
|                              |         |             | (b) Give reasons for non-participation at each stage                                                                                                                                              |
|                              |         |             | (c) Consider use of a flow diagram                                                                                                                                                                |
| Descriptive data             | 14*     | 11          | (a) Give characteristics of study participants (eg demographic, clinical, social) and information on exposures and potential confounders                                                          |
|                              |         |             | (b) Indicate number of participants with missing data for each variable of interest                                                                                                               |
| Outcome data                 | 15*     | 11          | Report numbers in each exposure category, or summary measures of                                                                                                                                  |



|    |              |    |       |                                                                         |
|----|--------------|----|-------|-------------------------------------------------------------------------|
| 1  |              |    |       | exposure                                                                |
| 2  |              |    |       |                                                                         |
| 3  | Main results | 16 | 11/12 | (a) Give unadjusted estimates and, if applicable, confounder-adjusted   |
| 4  |              |    |       | estimates and their precision (eg, 95% confidence interval). Make clear |
| 5  |              |    |       | which confounders were adjusted for and why they were included          |
| 6  |              |    |       |                                                                         |
| 7  |              |    |       | (b) Report category boundaries when continuous variables were           |
| 8  |              |    |       | categorized                                                             |
| 9  |              |    |       |                                                                         |
| 10 |              |    |       | (c) If relevant, consider translating estimates of relative risk into   |
| 11 |              |    |       | absolute risk for a meaningful time period                              |
| 12 |              |    |       |                                                                         |
| 13 |              |    |       |                                                                         |
| 14 |              |    |       |                                                                         |
| 15 |              |    |       |                                                                         |
| 16 |              |    |       |                                                                         |
| 17 |              |    |       |                                                                         |
| 18 |              |    |       |                                                                         |
| 19 |              |    |       |                                                                         |
| 20 |              |    |       |                                                                         |
| 21 |              |    |       |                                                                         |
| 22 |              |    |       |                                                                         |
| 23 |              |    |       |                                                                         |
| 24 |              |    |       |                                                                         |
| 25 |              |    |       |                                                                         |
| 26 |              |    |       |                                                                         |
| 27 |              |    |       |                                                                         |
| 28 |              |    |       |                                                                         |
| 29 |              |    |       |                                                                         |
| 30 |              |    |       |                                                                         |
| 31 |              |    |       |                                                                         |
| 32 |              |    |       |                                                                         |
| 33 |              |    |       |                                                                         |
| 34 |              |    |       |                                                                         |
| 35 |              |    |       |                                                                         |
| 36 |              |    |       |                                                                         |
| 37 |              |    |       |                                                                         |
| 38 |              |    |       |                                                                         |
| 39 |              |    |       |                                                                         |
| 40 |              |    |       |                                                                         |
| 41 |              |    |       |                                                                         |
| 42 |              |    |       |                                                                         |
| 43 |              |    |       |                                                                         |
| 44 |              |    |       |                                                                         |
| 45 |              |    |       |                                                                         |
| 46 |              |    |       |                                                                         |
| 47 |              |    |       |                                                                         |
| 48 |              |    |       |                                                                         |
| 49 |              |    |       |                                                                         |
| 50 |              |    |       |                                                                         |
| 51 |              |    |       |                                                                         |
| 52 |              |    |       |                                                                         |
| 53 |              |    |       |                                                                         |
| 54 |              |    |       |                                                                         |
| 55 |              |    |       |                                                                         |
| 56 |              |    |       |                                                                         |
| 57 |              |    |       |                                                                         |
| 58 |              |    |       |                                                                         |
| 59 |              |    |       |                                                                         |
| 60 |              |    |       |                                                                         |

|                          |    |    |    |                                                                                                                                                                            |
|--------------------------|----|----|----|----------------------------------------------------------------------------------------------------------------------------------------------------------------------------|
| Other analyses           | 17 | 7  |    | Report other analyses done—eg analyses of subgroups and interactions, and sensitivity analyses                                                                             |
| <b>Discussion</b>        |    |    |    |                                                                                                                                                                            |
| Key results              | 18 | 7  | 12 | Summarise key results with reference to study objectives                                                                                                                   |
| Limitations              | 19 | 9  | 14 | Discuss limitations of the study, taking into account sources of potential bias or imprecision. Discuss both direction and magnitude of any potential bias                 |
| Interpretation           | 20 | 8  | 13 | Give a cautious overall interpretation of results considering objectives, limitations, multiplicity of analyses, results from similar studies, and other relevant evidence |
| Generalisability         | 21 | 9  | 14 | Discuss the generalisability (external validity) of the study results                                                                                                      |
| <b>Other information</b> |    |    |    |                                                                                                                                                                            |
| Funding                  | 22 | 10 | 15 | Give the source of funding and the role of the funders for the present study and, if applicable, for the original study on which the present article is based              |

\*Give information separately for cases and controls.

**Note:** An Explanation and Elaboration article discusses each checklist item and gives methodological background and published examples of transparent reporting. The STROBE checklist is best used in conjunction with this article (freely available on the Web sites of PLoS Medicine at <http://www.plosmedicine.org/>, Annals of Internal Medicine at <http://www.annals.org/>, and Epidemiology at <http://www.epidem.com/>). Information on the STROBE Initiative is available at <http://www.strobe-statement.org>.
